# 1 The ESX-1 secretion system senses bacterial contact and prepares 2 mycobacteria for environmental adaptation

3

4 Nadia Herrera<sup>1,3,\*</sup>, Pascal D. Odermatt<sup>4</sup>, Mark Voorhies<sup>5</sup>, Rachel Nakagawa<sup>1,3</sup>, Anita Sil<sup>5</sup>, Fred  
5 Chang<sup>4</sup>, Oren S. Rosenberg<sup>1,2,3,\*</sup>

6

7 1 Department of Medicine, University of California San Francisco, San Francisco, California, USA

8 2 Department of Biochemistry and Biophysics, University of California San Francisco, San  
9 Francisco, California, USA

10 3 Chan Zuckerberg Biohub, San Francisco, California, USA

11 4 Department of Cell and Tissue Biology, University of California San Francisco, San Francisco,  
12 California, USA

13 5 Department of Microbiology and Immunology, University of California San Francisco, San  
14 Francisco, California, USA

15 \* Correspondence to: [nadia.herrera@ucsf.edu](mailto:nadia.herrera@ucsf.edu) or [oren.rosenberg@ucsf.edu](mailto:oren.rosenberg@ucsf.edu)

16

## 17 **Abstract**

18 The ESX-1 system (6-kDa early secretory antigenic target (ESAT-6) secretion system-1) is  
19 essential for *Mycobacterium tuberculosis* pathogenesis and conjugal transfer in *Mycobacterium*  
20 *smegmatis*, yet little is known about how its function is regulated. Live-cell fluorescence  
21 microscopy showed natively expressed ESX-1 was organized into distinct foci predominantly  
22 observed at cell-cell contacts. These foci formed when two cells touched and required a fully  
23 assembled ESX-1 system in both bacteria, suggesting the generation of an ESX-1  
24 megacomplex across multiple membranes. The emergence of ESX-1 foci and ESX-1 secretion  
25 was environmentally dependent: foci formed in low nitrogen environments in which secretion  
26 was suppressed, yet with increasing concentrations of nitrogen, ESX-1 systems diffused along  
27 the plasma membrane and secretion was activated. Genome-wide transcriptional profiling  
28 revealed ESX-1 dependent induction of genes required for the SOS response and error prone  
29 DNA replication in high nitrogen. Based on these findings, we propose a new model of ESX-1  
30 function where ESX-1 localization and secretion are responsive to nitrogen levels and form an  
31 integral node in the mycobacterial response to neighboring cells and environmental adaptation.

32

## 33 Introduction

34 Mycobacteria utilize ESX (6-kDa early secretory antigenic target (ESAT-6) secretion) systems to  
35 shuttle specialized substrates across a diderm cell wall. ESX-like systems are widely conserved  
36 in saprophytic bacteria, including the actinobacteria and firmicute phyla, but they have greatly  
37 expanded in the mycobacteria (Baptista et al., 2013; Burts et al., 2008, 2005; Dumas et al.,  
38 2016; Garufi et al., 2008; Gey Van Pittius et al., 2001; Huppert et al., 2014; Way and Wilson,  
39 2005). There are five paralogous ESX systems in mycobacteria, termed ESX-1 – ESX-5, that  
40 stem from the ancestral ESX-4 which is most closely related to other systems in the broader  
41 phyla (Newton-Foot et al., 2016). The ESX systems have been implicated in the core  
42 characteristics of mycobacteria including virulence (ESX-1) (Cole et al., 1998; Sørensen et al.,  
43 1995), metal homeostasis (ESX-3) (Serafini et al., 2013, 2009, Siegrist et al., 2014, 2009;  
44 Tufariello et al., 2016), and phosphate regulation (ESX-5) (Elliott and Tischler, 2016). Single  
45 particle cryo-electron microscopy showed that two ESX systems (ESX-3 and ESX-5) share a  
46 defined structure, suggesting that the assembled ESX systems likely share an underlying  
47 biochemical mechanism (Beckham et al., 2021, 2017; Famelis et al., 2019; Poweleit et al.,  
48 2019), but have different biological functions possibly based in the use of different substrates or  
49 accessory factors (Beckham et al., 2017; Famelis et al., 2019; Phan et al., 2018; Poweleit et al.,  
50 2019; Siegrist et al., 2014). ESX loci in mycobacteria consist of the ESX conserved components  
51 (Ecc's), which include membrane-embedded components (EccB, EccC, EccD, and EccE),  
52 secretion substrates such as the Esx, PE, PPE, Esp proteins, motor ATPases such as EccCb  
53 and EccA, and regulatory elements (Figure 1A) (Berthet et al., 1998; Pallen, 2002).

54  
55 ESX-1, the first described ESX system, was identified through genomic studies as the key  
56 genetic difference between *Mycobacterium tuberculosis* and the attenuated *Mycobacterium*  
57 *bovis* BCG vaccine strain (Hsu et al., 2003; Pym et al., 2003, 2002; Sasseti and Rubin, 2003;  
58 Stanley et al., 2003). The ESX-1 system is highly conserved in the non-pathogenic model  
59 organism, *Mycobacterium smegmatis* whose ESX-1 system shares a 72% nucleotide sequence  
60 conservation with *M. tuberculosis* ESX-1 across the protein coding regions of ESX-1  
61 components (Converse and Cox, 2005). As *M. smegmatis* is non-pathogenic, ESX-1 clearly has  
62 additional functions besides those associated with pathogenesis. For instance, it has been  
63 associated with regulation of conjugal DNA transfer in the *M. smegmatis* strain MC<sup>2</sup>155 and  
64 other mycobacterial species (Gray et al., 2016; Gröschel et al., 2016). However, in general, the  
65 functions of ESX-1 secretion remain poorly understood.

66

67 The localization of ESX-1 in bacterial cells remains unclear. Previous studies localized  
68 overexpressed GFP-fusion of ESX-1 associated proteins EccCb<sub>1</sub> and EccE<sub>1</sub> to the polar regions  
69 of *M. smegmatis*, and *M. tuberculosis* (Soler-Arnedo et al., 2020; Wirth et al., 2012). Polar  
70 localization was also seen in *M. marinum* using immunofluorescence on a cell wall deficient  
71 mutant ( $\Delta kasB$ ) (Carlsson et al., 2009). Combined, protein overexpression and cell wall  
72 interruption may disturb the physiological localization pattern of a membrane complex, leaving  
73 the localization of natively expressed ESX-1 components as an open question. Furthermore,  
74 there is growing evidence that ESX-1 secretion systems are regulated by environmental factors  
75 during *M. tuberculosis* infection (Berthet et al., 1998; Fortune et al., 2005). In addition, in *M.*  
76 *smegmatis*, ESX-1 secretion was found to be active when cells were grown on Sauton's  
77 medium, and largely inactive in 7H9 medium (Converse and Cox, 2005). The ramifications of  
78 ESX-1 regulation are yet to be explored.

79

80 In this work we constructed functional GFP fusions expressed at endogenous levels to study the  
81 localization of ESX-1 components. We found that ESX-1 formed discrete foci at either side of a  
82 cell-cell contact in cells grown in 7H9 medium, a condition in which ESX-1-mediated EsxB  
83 secretion was inhibited. Conversely, ESX-1 was localized diffusely around the membrane in  
84 Sauton's medium, when ESX-1 secretion of EsxB was active. We show that the increase in  
85 nitrogen levels in Sauton's medium was sufficient to induce both re-localization and activation of  
86 ESX-1 secretion of EsxB. We used RNAseq to probe the physiological function of ESX-1 and  
87 discovered that ESX-1 was necessary for activating the mycobacterial SOS response to  
88 nitrogen addition. Taken together, these findings, suggested an unexpected function of the  
89 ESX-1 secretion system in regulating stress responses in high nitrogen environments that may  
90 inform on its role in mycobacterial pathogenesis.

91

## 92 **Results**

### 93 **ESX-1 forms stable foci at cell-cell contacts**

94 Prior studies reported the localization of heterologous ESX-1 components upon overexpression  
95 of plasmid-based EGFP fusions (Soler-Arnedo et al., 2020; Wirth et al., 2012), which in some  
96 cases, leads to non-physiological localization. To investigate the localization of native ESX-1  
97 expressed at endogenous levels, we introduced an EGFP tag into multiple ESX-1 components  
98 in the chromosome. We determined that EccCb<sub>1</sub>-EGFP was a functional EGFP fusion, as  
99 shown by a secretion assay probing for EsxB in the culture medium although other fusions were

100 not functional (Figure 1A). We grew these cells to exponential phase in 7H9 liquid medium and  
101 then mounted them into microfluidic chambers for time lapse spinning disc confocal microscopy.

102

103 In the minority of cells that were not physically contacting another one, EccCb<sub>1</sub>-EGFP exhibited  
104 a dim localization around the whole plasma membrane (Figure 1B, top panel). This localization  
105 was accentuated by time averaging the images (t avg.). Kymography analysis showed that this  
106 intensity was maintained over time (Figure 1C, top). However, most cells clumped together in  
107 large aggregates in 7H9. In cells that were contacting others, we found that ESX-1 components  
108 formed discrete foci at regions of cell-cell contact (Figure 1D middle and bottom panels). These  
109 foci were observed at the contact site between cells that occurred either along the cell body  
110 (Figure 1B middle panel) or between two cell poles (Figure 1D bottom panel). The foci were  
111 stable in intensity and were immobile for the duration of the measurement (Figure 1D, t = 0 min  
112 – t = 60 min and t avg.). The stability of the foci is illustrated in a kymograph (Figure 1C middle  
113 and bottom panels). This observation demonstrates that ESX-1 foci form at cell-cell contact  
114 sites and are not limited to cell poles. We also confirmed that EccCb<sub>1</sub>-EGFP plasmid-based  
115 overexpression caused foci formation at the poles, regardless of cell-cell contact (Supplemental  
116 Figure 1) suggesting that previously reported polar localization may be due to overexpression of  
117 and subsequent EGFP self-interaction (Landgraf et al., 2012). In addition, we show that  
118 endogenous expression of the monomeric construct of EGFP, mEGFPmut3, yields similar  
119 observations of foci at cell-cell junctions and does not differ from our EGFP observations  
120 (Supplemental Figure 2).

121

122 We used time-lapse microscopy to investigate the dynamics of focus formation (Figure 1D).  
123 Growing cells were observed while contacting each other and forming an ESX-1 focus on the  
124 cell-cell contact point. A representative example is shown in Figure 1C. At t = 0 min when the  
125 cells were near but not touching each other, there were no detectable foci. At t = 30 min multiple  
126 dim foci appeared along the contact region. By t = 35 min onward there was a single, persistent  
127 ESX-1 focus on the contact site that persisted. A kymograph of the entire time-lapse acquisition  
128 at the cell-cell contact site illustrates this behavior over time (Figure 1E). EGFP intensity plots  
129 show that the foci form within 5 minutes (Figure 1F) in a few examples. These images provide a  
130 striking demonstration that ESX-1 focus formation accompanies cell-cell contact.

131

132

133

134 **ESX-1 foci form large oligomers at cell-cell contact sites**

135 The discrete ESX-1 foci suggested that ESX-1 formed large oligomeric assemblies at the  
136 membrane at cell-cell contacts. To quantify the number of ESX-1 complexes at these sites we  
137 compared the fluorescent intensity of EccCb<sub>1</sub>-EGFP foci to the MotB-EGFP complex which has  
138 been reported to contain 22 +/- 4 EGFP molecules in each focus (Coffman and Wu, 2012; Leake  
139 et al., 2006; Pan et al., 2014) (Supplemental Figure 3). Measurements of EGFP intensity of these  
140 foci indicated that the EccCb<sub>1</sub>-EGFP foci were 6-fold more intense than MotB-EGFP foci (Figure  
141 1G). Measured intensities were uniformly distributed, following a gaussian distribution. This  
142 analysis suggests that a single ESX-1 focus contains approximately 132 individual EGFP  
143 molecules. Considering the predicted hexameric structure of ESX systems (Famelis et al., 2019;  
144 Poweleit et al., 2019), this suggests roughly 22 hexameric complexes of ESX-1 at each focus.  
145 This arrangement suggests that ESX-1 forms a large complex at the membrane of cell-cell  
146 contacts.

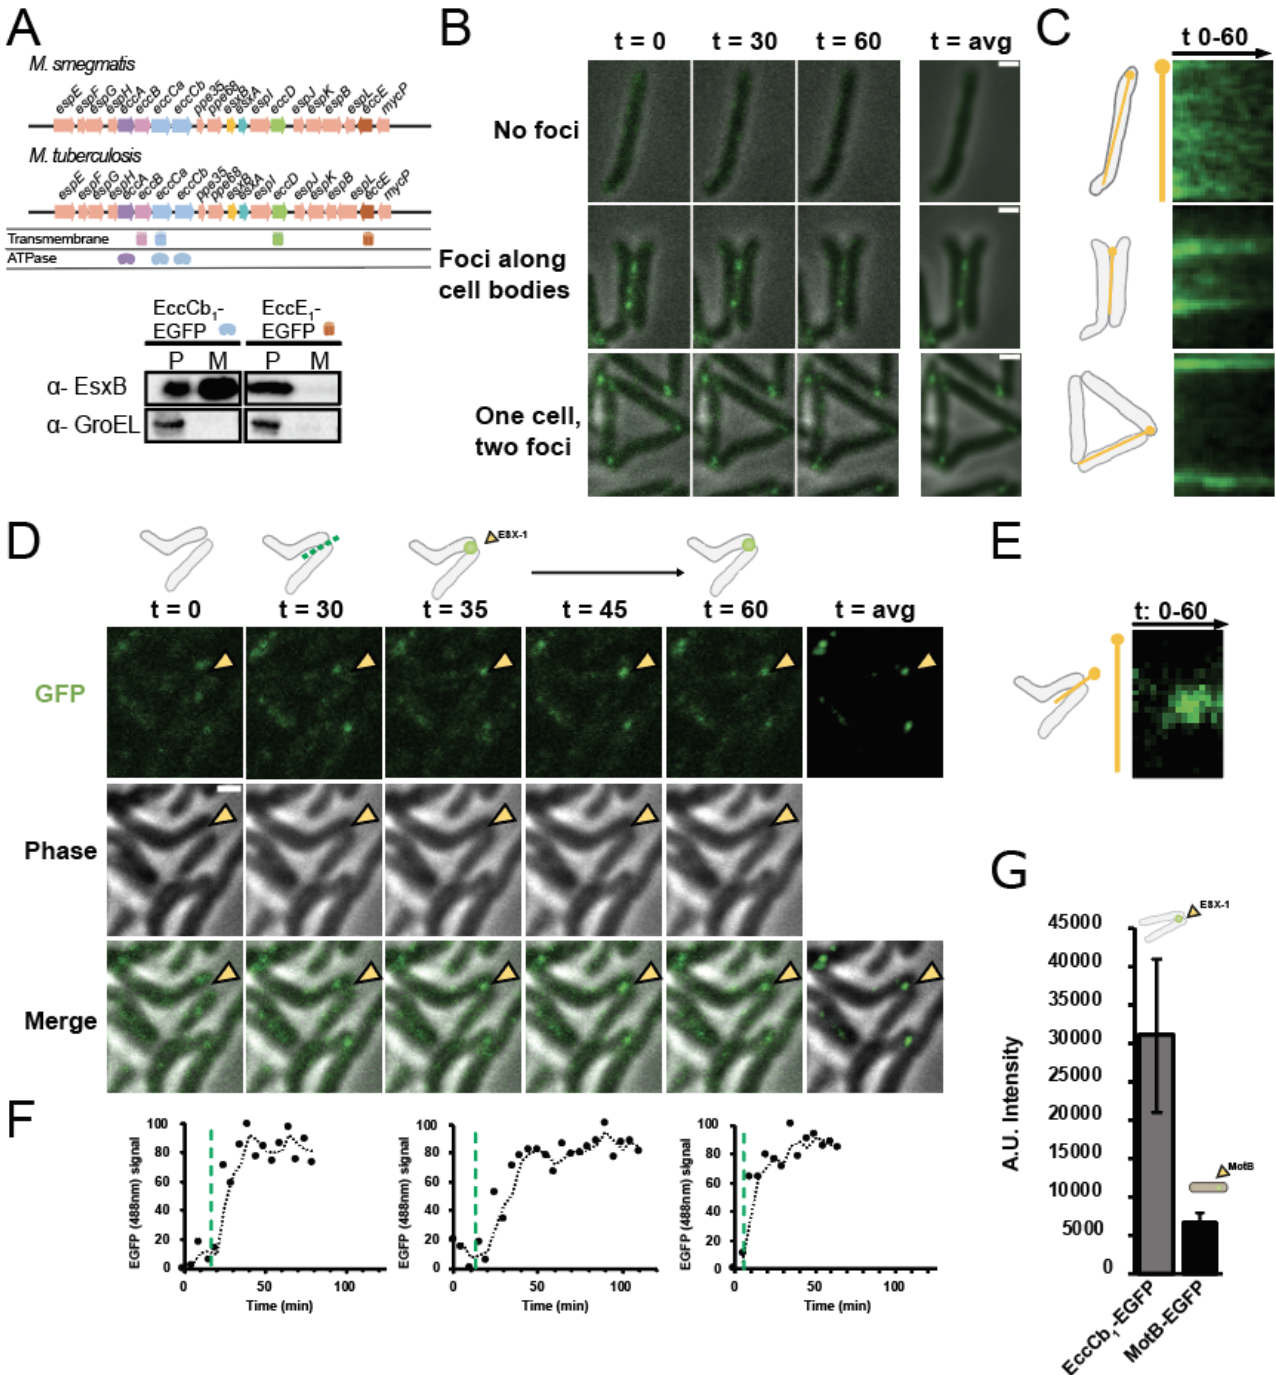

147

148 **Figure 1: ESX-1 forms foci at cell-cell contacts**

149 A) Top- Organization of ESX-1 operon in *M. smegmatis* and *M. tuberculosis*. Proteins with  
 150 transmembrane domains and ATPase cassettes are defined. Bottom- Secretion assay in  
 151 EccCb<sub>1</sub>-EGFP and EccE<sub>1</sub>-EGFP strains of *M. smegmatis*. Schematic of gene within the operon  
 152 is shown to the right of the label. Western blot shows the ESX-1 substrate EsxB secreted into  
 153 the medium. P represents pellets and M represents medium, and anti-GroEL antibody shows

154 the integrity of the loaded samples. B) Confocal microscopy images of distinct cell-cell contacts  
155 at time points 0, 30, and 60 minutes; only merged image depicted. Time averaged (t avg.)  
156 images represent averaged images over entire time course. C) Schema of images in A. The  
157 yellow pin depicts location of kymograph of GFP signal through the time-lapse acquisition in  
158 panel A. D) Top- Schema illustrates a cartoon rendition of EGFP foci formation event. Bottom-  
159 Confocal microscopy images of growing cultures at time points 0, 30 and 35 minutes, and  
160 average, an average of all time points. Imaging channels include GFP, phase, and merged  
161 channels of two cells encountering each other. Point of cell-cell contact depicted by yellow  
162 arrowhead. E) Kymograph represents EGFP signal throughout duration of the experiment at the  
163 cell-cell contact site. F) Normalized integrated fluorescence measurements of 3 distinct cell-cell  
164 contact events. Green dashed line indicates time of contact as determined by phase images.  
165 Top graph corresponds to images in 1A. G) Fluorescence intensity measurements of EccCb<sub>1</sub>-  
166 EGFP in both *M. smegmatis* (grey, N = 53) and MotB-EGFP *E. coli* (black, N = 101). Foci were  
167 quantified for three biological replicates. Error bars indicate standard deviation of  
168 measurements. Scale bar located on top right corner of images, 1µm.

169

170

171

172

173

174

175

176

177

178

179

180

181

182

183

184

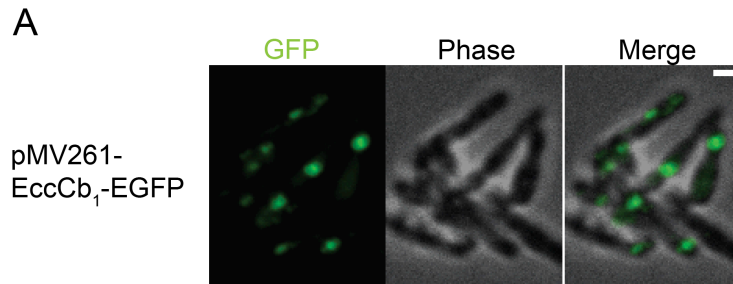

185

186

187 **Supplemental Figure 1: Visualization of EGFP constructs expressed on a plasmid.**

188 A) Time averaged confocal images acquired every 5 minutes for the duration of an hour are  
189 depicted. Phase and GFP channels are merged. Scale bar located on top right corner of image,  
190 1  $\mu$ m. Images were captured on cells expressing EccCb<sub>1</sub>-EGFP on 7H9 medium. Images  
191 representative of three biological replicates.

192

193

194

195

196

197

198

199

200

201

202

203

204

205

206



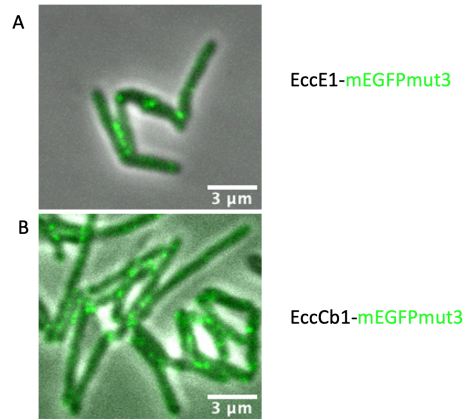

207

208

209 **Supplemental Figure 2: Visualization of mEGFPmut3 constructs.**

210 Time averaged confocal images acquired every 5 minutes for the duration of an hour are  
211 depicted. Phase and GFP channels are merged. Scale bar located on top right corner of  
212 images, 3 μm. Strains were imaged in 7H9 medium A) EccCb<sub>1</sub> – mEGFP mut3 B) EccE<sub>1</sub> –  
213 mEGFP mut3 is shown. Images representative of three biological replicates.

214

215

216

217

218

219

220

221

222

223

224

225

226

227

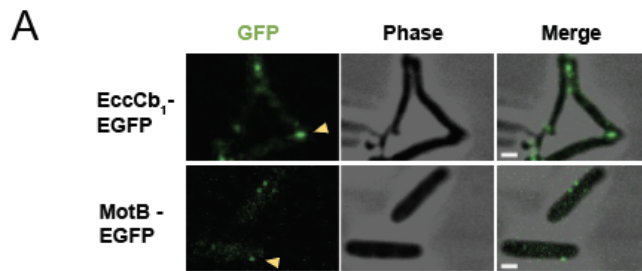

228

229

230 **Supplemental Figure 3: Images of single acquisitions of EGFP tagged ESX-1 and MotB.**

231 A) Representative confocal microscopy images of single acquisitions in *M. smegmatis* EccCb<sub>1</sub>-

232 EGFP (top) and *E. coli* MotB-EGFP. Foci are delineated by yellow arrowheads. Images

233 representative of three biological replicates.

234

235

236

237

238

239

240

241

242

243

244

245

246

247

248

249

250

251

252

253

254

255

256

### 257 **ESX-1 foci formation requires an intact ESX-1 system**

258 We next sought to address what molecular components of the ESX-1 system are needed for  
259 focus formation. *EccCb<sub>1</sub>* was endogenously labeled with EGFP in strains with a series of gene  
260 deletions in the ESX-1 operon. In our analysis (Figure 2) we scored whether a focus was  
261 present at cell-cell contacts (grey bars, depicted by schema on top right of graph). Deletion of  
262 *eccB<sub>1</sub>* resulted in decreased percentage of cells exhibiting *EccCb<sub>1</sub>*-EGFP foci at cell-cell  
263 contacts with only 30% of cell contacts displaying foci, while *eccD<sub>1</sub>* and *eccE<sub>1</sub>* deletions resulted  
264 in a complete lack of foci at cell contacts. In comparison, wildtype cells formed foci at all cell  
265 contacts 100% of the time (Figure 2A, B). Interestingly, upon deletion of *esxB*, a major secreted  
266 product of ESX-1, focus formation remains largely unaffected, with 99% of cell contacts  
267 displaying foci (Figure 2A, bottom panel and Figure 2B). We complemented the deleted *ecc*  
268 components in the appropriate strains using an integrative plasmid harboring the gene of  
269 interest under a neutral promoter. Analysis of cell-cell contacts demonstrated that focus  
270 formation was largely rescued (Figure 2B). These results indicated that ESX-1 focus formation  
271 was dependent on integral membrane components within the Ecc's of ESX1 but did not require  
272 its substrate, *EsxB*, or the secretion of the substrates dependent on *EsxB*.

273

### 274 **ESX-1 forms a megacomplex across two contacting cells**

275 We determined whether ESX-1 complexes at cell-cell contacts were a one or two-sided  
276 interaction. To address this question, we used a co-culturing experiment in which strains  
277 expressing *EccCb<sub>1</sub>*-EGFP were mixed with *ecc* knockout strains marked with a cytoplasmic  
278 mCherry and assayed whether *EccCb<sub>1</sub>*-EGFP foci were detected at cell-cell contact sites. As  
279 shown by representative time averaged images, focus formation was induced between wild-type  
280 and  $\Delta$ *esxB* strains, whereas all *ecc* knockout strains were largely unable to induce foci formation  
281 in the other cell (Figure 2C). Focus formation in  $P_{mCherry}$  wild-type and  $\Delta$ *esxB* cells retained ~  
282 99% focus formation at cell-cell contacts with *EccCb<sub>1</sub>*-EGFP cells (Figure 2D). Focus formation  
283 at cell-cell contacts between  $P_{mCherry}$ -*ecc* knockouts and *EccCb<sub>1</sub>*-EGFP labeled cells was as  
284 follows: in  $\Delta$ *eccB<sub>1</sub>*-  $P_{mCherry}$  5%,  $\Delta$ *eccCa<sub>1</sub>*-  $P_{mCherry}$  3%,  $\Delta$ *eccD<sub>1</sub>*-  $P_{mCherry}$  13%, and  $\Delta$ *eccE<sub>1</sub>*- $P_{mCherry}$   
285 10% (Figure 2D). In all instances, foci still formed between *EccCb<sub>1</sub>*-EGFP labeled cells,  
286 indicating that focus formation was unaffected by the co-culture milieu (Figure 2C). We  
287 concluded ESX-1 focus formation required assembly of the ESX-1 complex in both contact  
288 cells, suggesting that ESX-1 clusters at the cell-cell contact sites on both plasma membranes,  
289 stabilizing each other, and forming a megacomplex that includes across both cell membranes

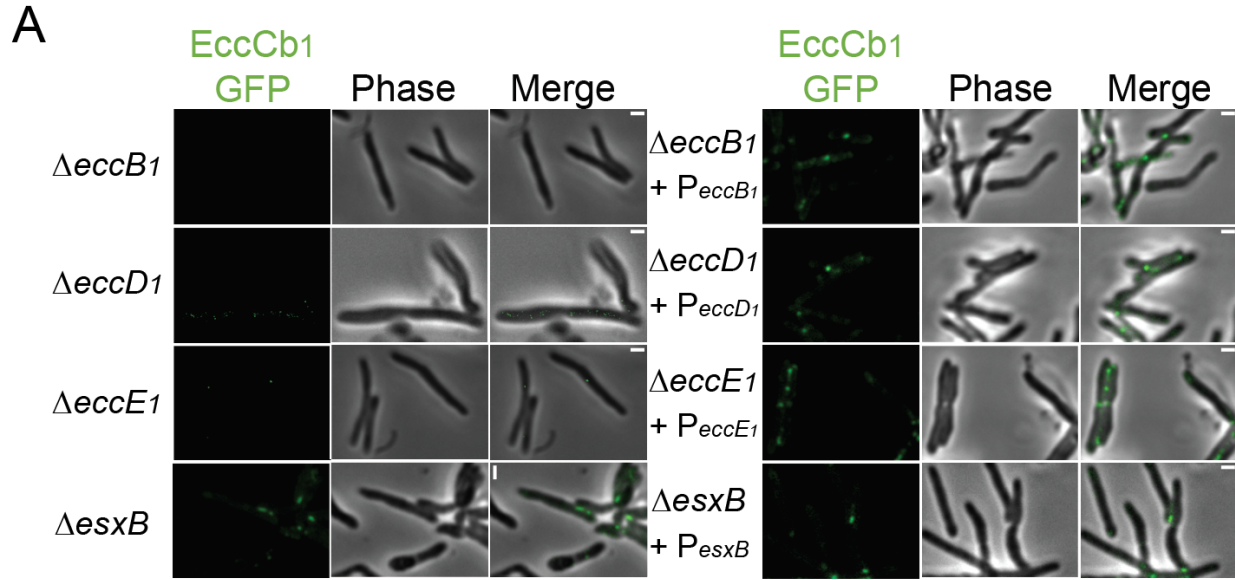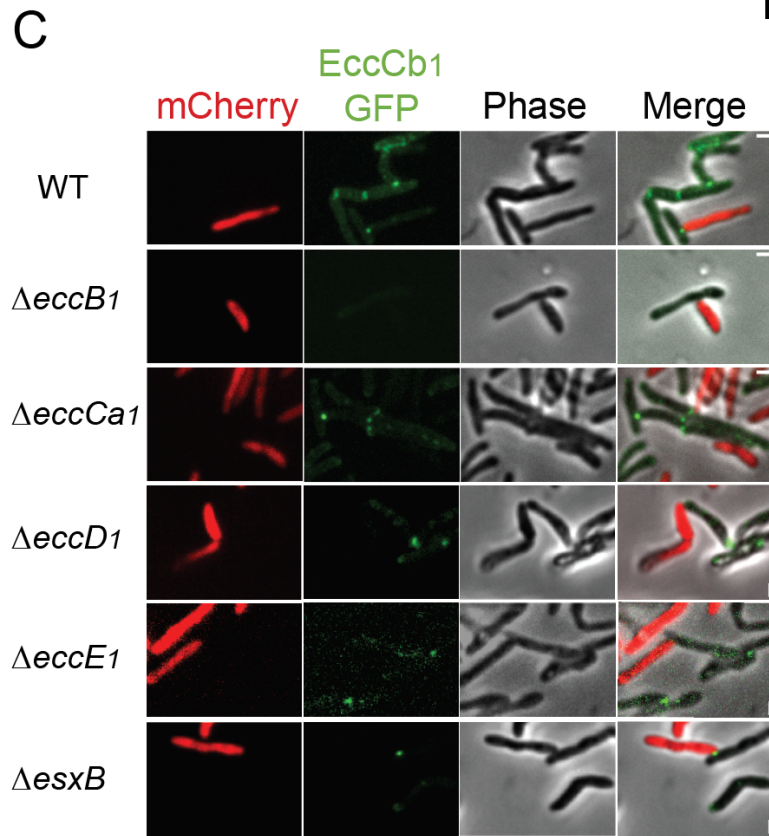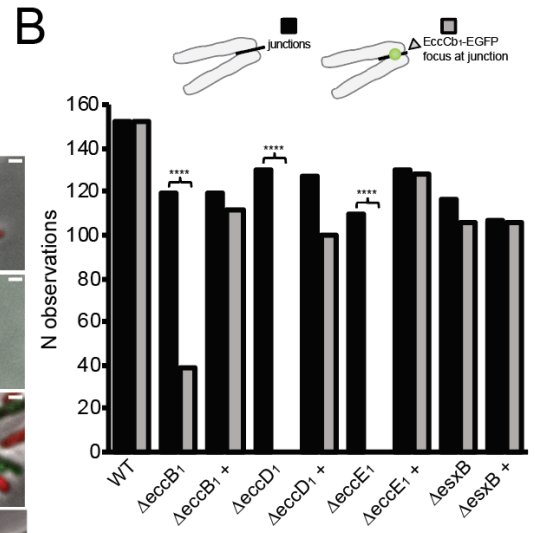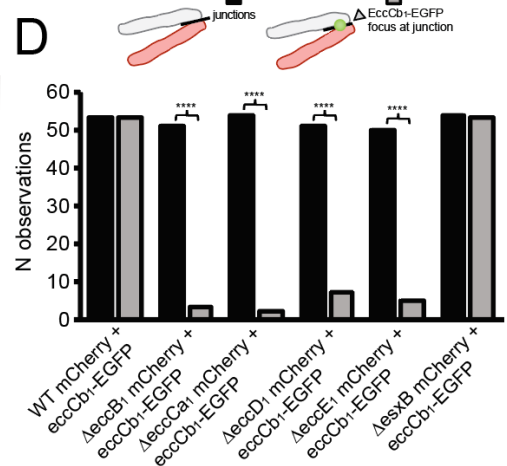

290

291

292 **Figure 2: ESX-1 is required at both interfaces to form a focus**

293 Time averaged confocal images acquired every 5 minutes for the duration of an hour are  
294 depicted. A) ESX-1 essential conserved components (ecc's) were knocked out and EccCb1-  
295 EGFP was used as a tracer. Left panel shows GFP, phase and merged channels. Blue  
296 arrowheads indicate contacts with no foci at cell-cell contacts. Right panel shows GFP, phase  
297 and merged channels, yellow arrowheads represent cell-cell contacts where foci formation was  
298 restored upon complementation of the knocked out ecc component. B) Foci were quantified for  
299 three biological replicates, across 100+ contacts per strain (reported on Y-axis as N  
300 observations) in both knockouts of ESX-1 and complement strains. Difference between both  
301 measurements is statistically significant per student's t-test, \*\*\*\* P < 0.0001. C) Co-cultures of  
302 EccCb<sub>1</sub>-EGFP with wildtype,  $\Delta eccB_1$ ,  $\Delta eccCa_1$ ,  $\Delta eccD_1$ ,  $\Delta eccE_1$ ,  $\Delta esxB$  (top to expressing  
303 mCherry are shown (top to bottom). Schema on the left represents the strains captured in the  
304 images. Foci at cell-cell contacts are outlined by yellow arrowheads, while cell-cell contacts  
305 lacking foci are outlined by blue arrowheads. Scale bar located on top right corner of images,  
306 1 $\mu$ m. D) Foci were quantified for three biological replicates, across 50+ contacts per strain  
307 across the panel of co-cultures (reported on Y-axis as N observations). Difference between both  
308 measurements is statistically significant per student's t-test, \*\*\*\* P < 0.0001. Scale bar located  
309 on top right corner of images, 1 $\mu$ m.

310

311

312

313

314

315

316

317

318

319

320

321

322

323

324

325

326 **High nitrogen concentrations in growth medium triggers ESX-1 secretion in *M.***  
327 ***smegmatis***

328 We next investigated if focus formation was dependent on environmental conditions.  
329 Observations of ESX-1 focus formation were made in 7H9 medium, however, previous studies  
330 (Converse and Cox, 2005) showed that cultures grown in 7H9 medium suppressed ESX-1  
331 secretion of EsxB, while those grown in Sauton's media were proficient in EsxB secretion  
332 (reproduced in Figure 3A). We tested whether these differences in medium affected ESX-1  
333 focus formation. Cells were grown to exponential phase in either 7H9 or Sauton's medium and  
334 mounted into microfluidic chambers for time lapse spinning disc confocal microscopy. Time-  
335 averaged images of cells grown in secretion-inducing Sauton's medium (Figure 3D and 3E)  
336 revealed the absence of ESX-1 foci at cell-cell junctions, while time averaged images of cells  
337 grown in 7H9 exhibited ESX-1 foci. In Sauton's medium the EGFP signal was distributed  
338 throughout the plasma membrane, regardless of contact site with surrounding cells (Figure 3E).  
339

340 The two media differ in the amount of available nitrogen and carbon sources, with Sauton's  
341 medium containing about 6X as much nitrogen and 25X as much carbon as 7H9 medium. (7H9  
342 contains 1.1 mM elemental nitrogen and 10.4 mM elemental carbon, while Sauton's contains 6.4  
343 mM and 269.8 mM, respectively) Higher concentrations of carbon favor typical, clumped growth  
344 of *M. smegmatis* in liquid medium (DePas et al., 2019), while higher concentrations of nitrogen  
345 favor planktonic growth (DePas et al., 2019; Glaeser and Taylor, 1978). Thus, we investigated  
346 whether altering the concentration of nitrogen alone is sufficient to induce ESX-1 secretion of  
347 EsxB into the medium. Cultures were grown in modified M63 minimal medium, which supports  
348 mycobacterial growth in a range of carbon and/or nitrogen concentrations (DePas et al., 2019).  
349 We systematically altered the level of nitrogen from 1.02 mM nitrogen (M63) to 6.26 mM (M63  
350 N+) characteristic respectively of 7H9 and Sauton's. Secretion of the ESX-1 substrate, EsxB, into  
351 the spent media only occurred in the M63 N+ medium (Figure 3B). We confirmed that this  
352 secretion of EsxB was dependent on the ESX-1 system (Figure 3C). We next tested whether cells  
353 lacking ESX-1 show clumping in low nitrogen (M63) and dispersal in high nitrogen (M63 N+).  
354 Cultures were analyzed by macroscopic analysis of growths in a culture tube, as reported  
355 prior(DePas et al., 2019). The growths showed that deletion mutants of ESX-1 did not have  
356 differential growth from wild-type cells in either medium (Supplemental Figure 4).  
357 Given the strong induction of ESX-1 secretion we asked whether the transition of ESX-1 to a  
358 secretion-competent form is due to changes in gene expression of ESX-1 components. Our  
359 findings show that expression levels of EccCb<sub>1</sub>-EGFP are similar in M63 and M63 N+ (Figure

360 4A). To investigate transcriptional changes in ESX-1 we analyzed global transcriptional profiles  
361 (RNAseq) of *M. smegmatis* grown in M63 and M63 N+ media (Figure 4B). Analysis of the genes  
362 in the ESX-1 operon showed these (MSMEG\_0055 – MSMEG\_0082) are not differentially  
363 translated (Figure 4B, orange circles). In addition, we observed consistent signatures for the  
364 major downregulated genes in high nitrogen conditions, such as nitrogen importers (Figure 4B,  
365 green circles; MSMEG\_2425- AmtB, MSMEG\_6259- Amt1, MSMEG\_4635- AmtA). Collectively,  
366 these results strongly suggest that high nitrogen promotes ESX-1 secretion. through post-  
367 translational changes to the system

368

369

370

371

372

373

374

375

376

377

378

379

380

381

382

383

384

385

386

387

388

389

390

391

392

393

394

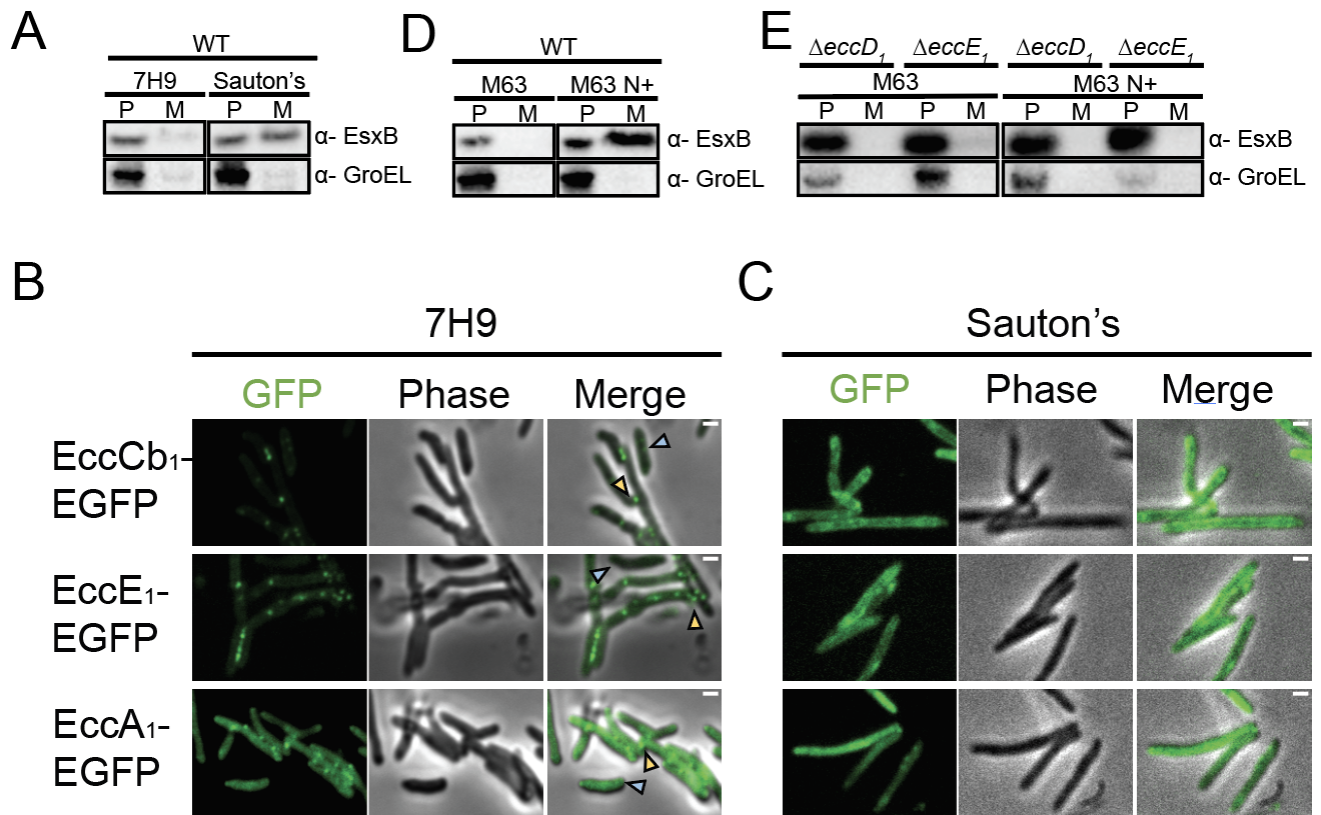

395

396

397 **Figure 3: EsxB secretion is triggered by environmental nitrogen levels**

398 Western blot shows the ESX-1 substrate EsxB secreted into the medium. P represents pellets  
399 and M represents medium, and anti-GroEL antibody shows the integrity of the loaded samples.

400 A) Secretion assay in 7H9 and Sauton's medium. Experiments shown are representative of  
401 three biological replicates. B) EccCb<sub>1</sub>-EGFP, EccE<sub>1</sub>-EGFP, and EccA<sub>1</sub>-EGFP cultured in 7H9

402 medium are shown. Yellow arrows depict foci at cell-cell contacts, blue arrows depict singular  
403 cells lacking foci. C) EccCb<sub>1</sub>-EGFP, EccE<sub>1</sub>-EGFP, and EccA<sub>1</sub>-EGFP cultured in Sauton's

404 medium are shown. Scale bar located on top right corner of images, 1µm. D) Secretion assay in  
405 defined minimal medium, M63 and M63 with ammonium chloride (M63 N+). E) Secretion assay

406 with M63 and M63 N+ on ESX-1 *eccD*<sub>1</sub> and *eccE*<sub>1</sub> knockouts. Secretion requires the entire ESX-  
407 1 assembly to occur.

408

409

410

411



412

A

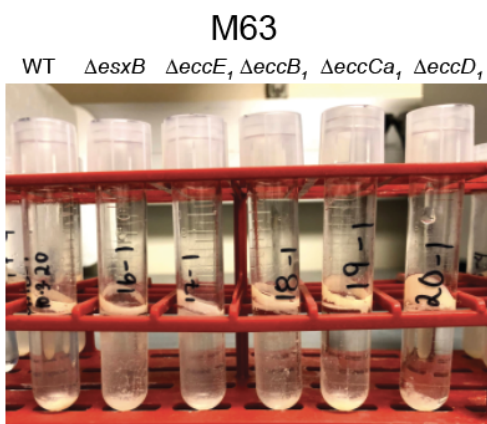

B

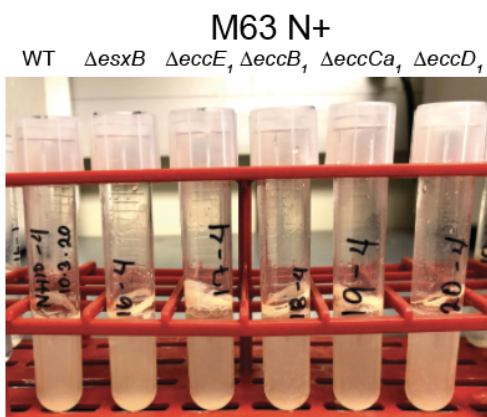

413

414 **Supplemental Figure 4: *M. smegmatis* cultures in M63 vs M63 N+.**

415 Wildtype (WT),  $\Delta esxB$ ,  $\Delta eccE_1$ ,  $\Delta eccB_1$ ,  $\Delta eccCa_1$ , and  $\Delta eccD_1$  are shown. Representative of  
416 three biological replicate growths. A) Growth in M63 medium. B) Growth in M63 N+ medium.

417

418

419

420

421

422

423

424

425

## 426 **Nitrogen levels regulate ESX-1 foci formation**

427 To investigate if nitrogen was sufficient to trigger the dissolution of ESX-1 foci, we imaged  
428 *EccCb<sub>1</sub>-EGFP* grown in M63 supplemented with varying concentrations of nitrogen. *EccCb<sub>1</sub>-*  
429 *EGFP* cultures grown in M63 medium exhibited foci formed at 100% of cell-cell contacts, similar  
430 to those observed in 7H9 medium (Figure 4C and 4D). Stepwise addition of  $\text{NH}_4\text{Cl}$  to the growth  
431 medium led to dissipation of foci as a function of  $\text{NH}_4\text{Cl}$  concentration; at 5 mM  $\text{NH}_4\text{Cl}$  15% of  
432 contacts retained focus formation, at 10 mM  $\text{NH}_4\text{Cl}$  3% of contacts retained focus formation and  
433 at 20 mM  $\text{NH}_4\text{Cl}$  0% of contacts exhibited focus formation (Figure 4C and 4D).

434

435 As high nitrogen conditions induce planktonic growth (DePas et al., 2019), we investigated if  
436 other stimuli which trigger planktonic growth of cells, such as carbon starvation, also regulate  
437 focus formation. We cultured cells in M63 medium in which pyruvate was provided as a less  
438 bioavailable carbon source compared to glycerol (M63 + pyruvate / - glycerol)(DePas et al.,  
439 2019). Time averaged images of pyruvate grown cultures demonstrated that focus formation  
440 occurred at 81% of cell-cell contacts (Figure 4C and D). In media with both pyruvate and  
441 nitrogen (M63 + pyruvate - glycerol + 20 mM  $\text{NH}_4\text{Cl}$ ), none of the cells exhibited stable foci at  
442 cell-cell contacts (Figure 4C and 4D). We note that in pyruvate supplemented culture conditions,  
443 we sometimes observed ESX-1 at poles in isolated cells. It is possible these cells are  
444 experiencing additional stress causing this localization. Overall, our experiments demonstrate  
445 that ESX-1 responds specifically to excess nitrogen by dissociating ESX-1 foci at cell-cell  
446 contacts. This change in ESX-1 may be in response to nitrogen levels rather than shift to  
447 planktonic growth. Further, the change in localization correlated with active secretion of EsxB  
448 into the spent growth medium. This distinct change indicated that when actively secreting, ESX-  
449 1 is dispersed from its focal form, which strongly suggested that formation of ESX-1 foci  
450 correlates with an alternate non-secretory state of ESX-1.

451

452

453

454

455

456

457

458

459

460

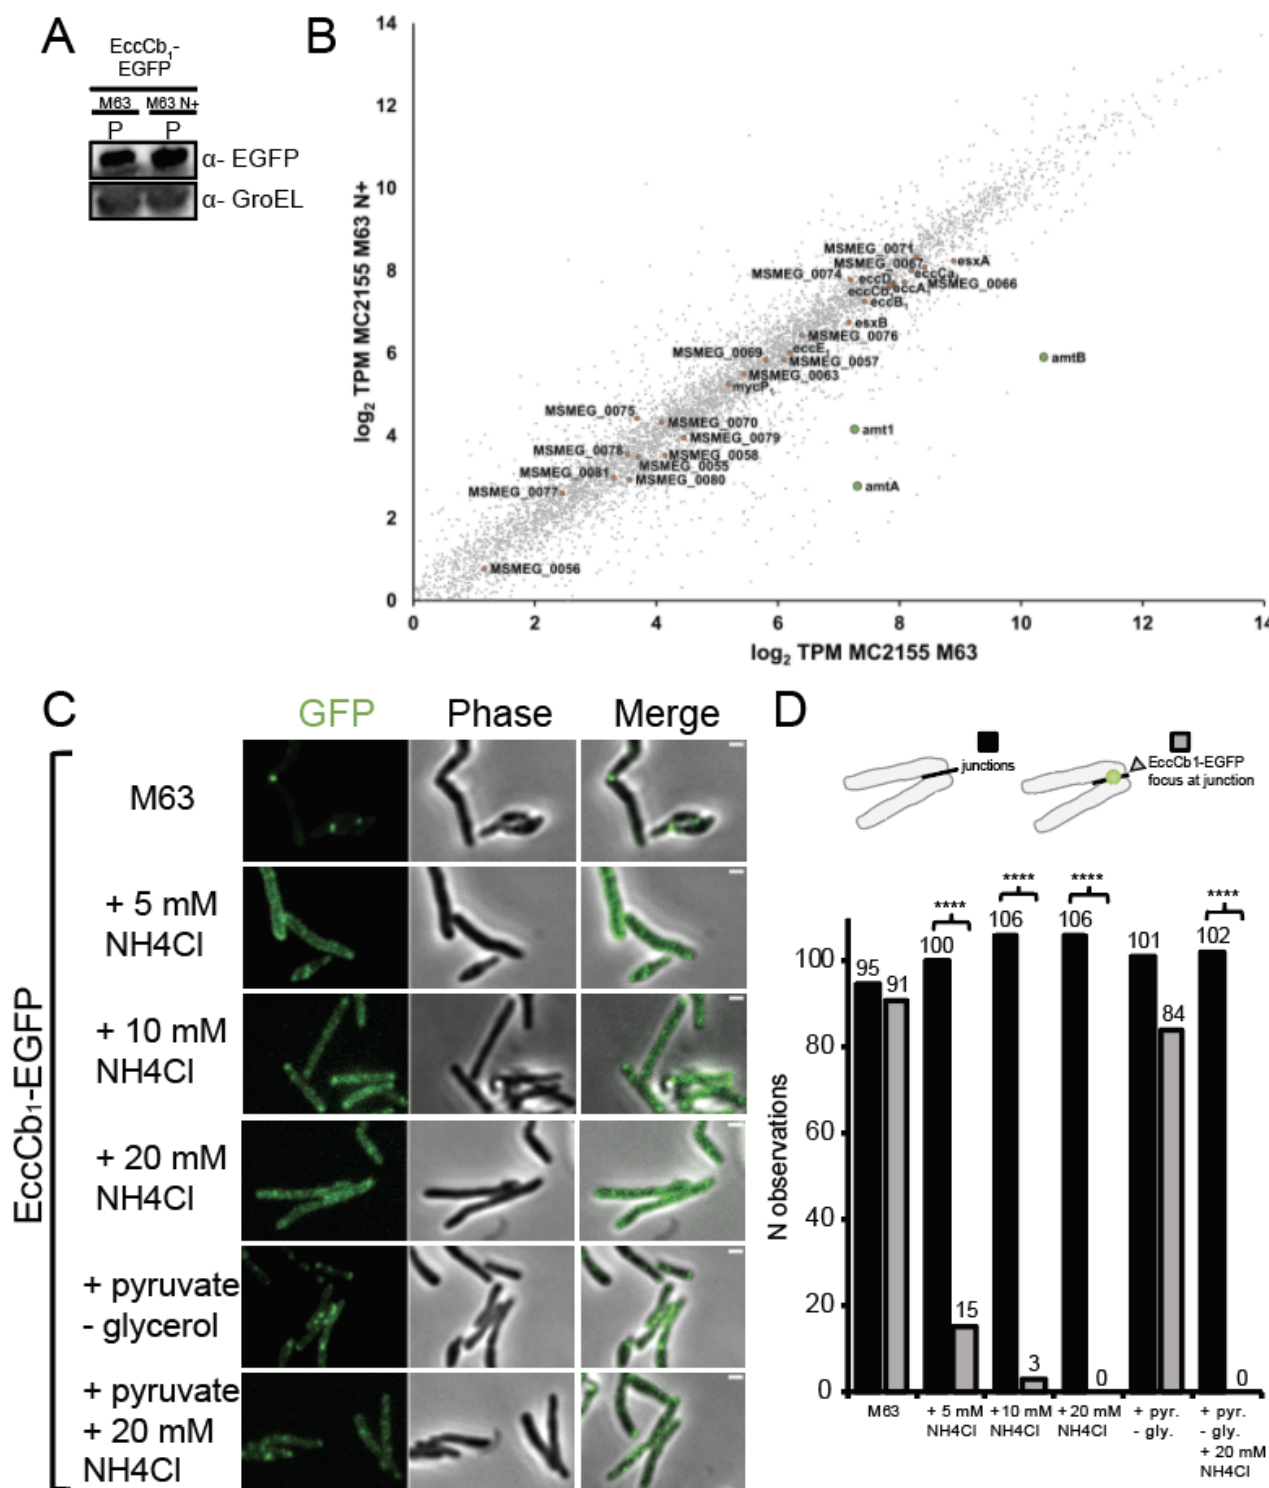

461

462 **Figure 4: ESX-1 foci are inhibited by high nitrogen in the medium**

463 A) ESX-1 expression in cells was assessed with an endogenous EGFP marker on EccCb<sub>1</sub>. Anti-

464 GFP demonstrates levels of ESX-1 expression in M63 and M63 N+ medium. B) Transcript

465 abundances (as log<sub>2</sub> transcripts per million) measured by RNAseq in wild-type *M. smegmatis*  
466 growing in M63 (y-axis) vs M63 N+ (x-axis). Orange circles represent ESX-1 genes. Green  
467 circles represent downregulated transporters in response to nitrogen addition. Time averaged  
468 confocal images acquired every 5 minutes for the duration of an hour are depicted. GFP, Phase  
469 and merged channels are shown. Scale bar located on top right corner of images, 1µm. A)  
470 EccCb<sub>1</sub>-EGFP, EccE<sub>1</sub>-EGFP, and EccA<sub>1</sub>-EGFP cultured in 7H9 medium are shown. Yellow  
471 arrows depict foci at cell-cell contacts, blue arrows depict singular cells lacking foci. B) EccCb<sub>1</sub>-  
472 EGFP, EccE<sub>1</sub>-EGFP, and EccA<sub>1</sub>-EGFP cultured in Sauton's medium are shown. C) EccCb<sub>1</sub>-  
473 EGFP cultured in M63, M63 N+, or M63 minimal medium supplemented with pyruvate to induce  
474 carbon scarcity. D) Foci were quantified across 90+ contacts per strain for three biological  
475 triplicates in distinct M63 media. Exact numbers are denoted above corresponding data bar and  
476 are outlined on the Y-axis as N observations. Difference between both measurements is  
477 statistically significant per student's t-test, \*\*\*\* P < 0.0001.

478

479

480

481

482

483

484

485

486

487

488

489

490

491

492

493

494

495

496

497

498

## 499 **Transcriptional response to nitrogen reveals a function of ESX-1 in SOS regulation**

500 To probe the possible function of ESX-1 in nitrogen response, we analyzed RNAseq profiles of  
501 various strains of *M. smegmatis* grown in either M63 or M63 N+. Using a series of *M.*  
502 *smegmatis* strains (wild-type,  $\Delta esxB$ ,  $\Delta eccCa_1$ , and  $\Delta eccD_1$ ) we assessed whether nitrogen-  
503 dependent transcriptional gene regulation of genes by nitrogen is mediated by ESX-1. First, we  
504 examined a set of genes previously described in nitrogen metabolism (Amon et al., 2009;  
505 Petridis et al., 2015; Williams et al., 2013). Consistent with previous studies, the transcriptional  
506 profiles exhibited downregulation of nitrogen importer genes (*amtB*, *amt1* and *amtB*), the GlnR  
507 operon and nitrate assimilation genes, in M63 N+ (Figure 5A). The differential transcription of  
508 these genes remained unchanged in our ESX-1 deletion strains, which was confirmed by RT-  
509 qPCR (Figure 5B). Thus, ESX-1 was not required for the general transcriptional response to  
510 nitrogen (Figure 5A).

511  
512 Further analysis of RNAseq data from *M. smegmatis* strains grown in M63 and M63 +N showed  
513 an unexpected effect of ESX-1 on pathways not previously linked to nitrogen metabolism and  
514 ESX-1 functions. Overall, growing wild-type cultures in excess nitrogen resulted in 342  
515 downregulated and 438 upregulated genes in response to excess nitrogen (plotted in  
516 Supplemental Figure 5). Genes were considered differentially expressed if they had an absolute  
517  $\log_2$  fold change greater than 1 and were significantly differential at a false discovery rate (FDR)  
518 of 5%. In contrast, the ESX-1 mutants showed a distinct profile with 353 downregulated genes  
519 and 526 upregulated genes in  $\Delta eccCa_1$ , 389 downregulated and 621 upregulated genes in  
520  $\Delta eccD_1$ , and 351 downregulated genes and 607 upregulated genes in  $\Delta esxB$ , (plotted in  
521 Supplemental Figure 5). The differences in the transcriptional profile of the mutants were  
522 clustered in known regulons. Most strikingly, cultures grown in M63 N+ exhibited a strong  
523 upregulation of error-prone DNA replication pathways, such as the LexA regulon and associated  
524 genes in the SOS response; this upregulation was absent in ESX-1 mutants affecting  
525 membrane complex formation ( $\Delta eccCa_1$  and  $\Delta eccD_1$ ) and in the ESX-1 secreted substrate  
526 ( $\Delta esxB$ ) (Figure 5C). These observations were validated using RT-qPCR on error prone DNA  
527 replication machinery genes, *imuA*, *imuB*, *dnaE2*, and *recA* (Figure 5D). Interestingly, baseline  
528 levels of these elements were generally higher in ESX-1 knockout cultures grown in M63  
529 medium, which is especially evident in *recA*. This suggests ESX-1 mediates the adaptational  
530 response to environmental triggers, such as nitrogen. In the absence of ESX-1, a growing  
531 culture might not sense environmental conditions fully and compensates by harboring a higher  
532 baseline level of SOS induced error prone DNA replication machinery.

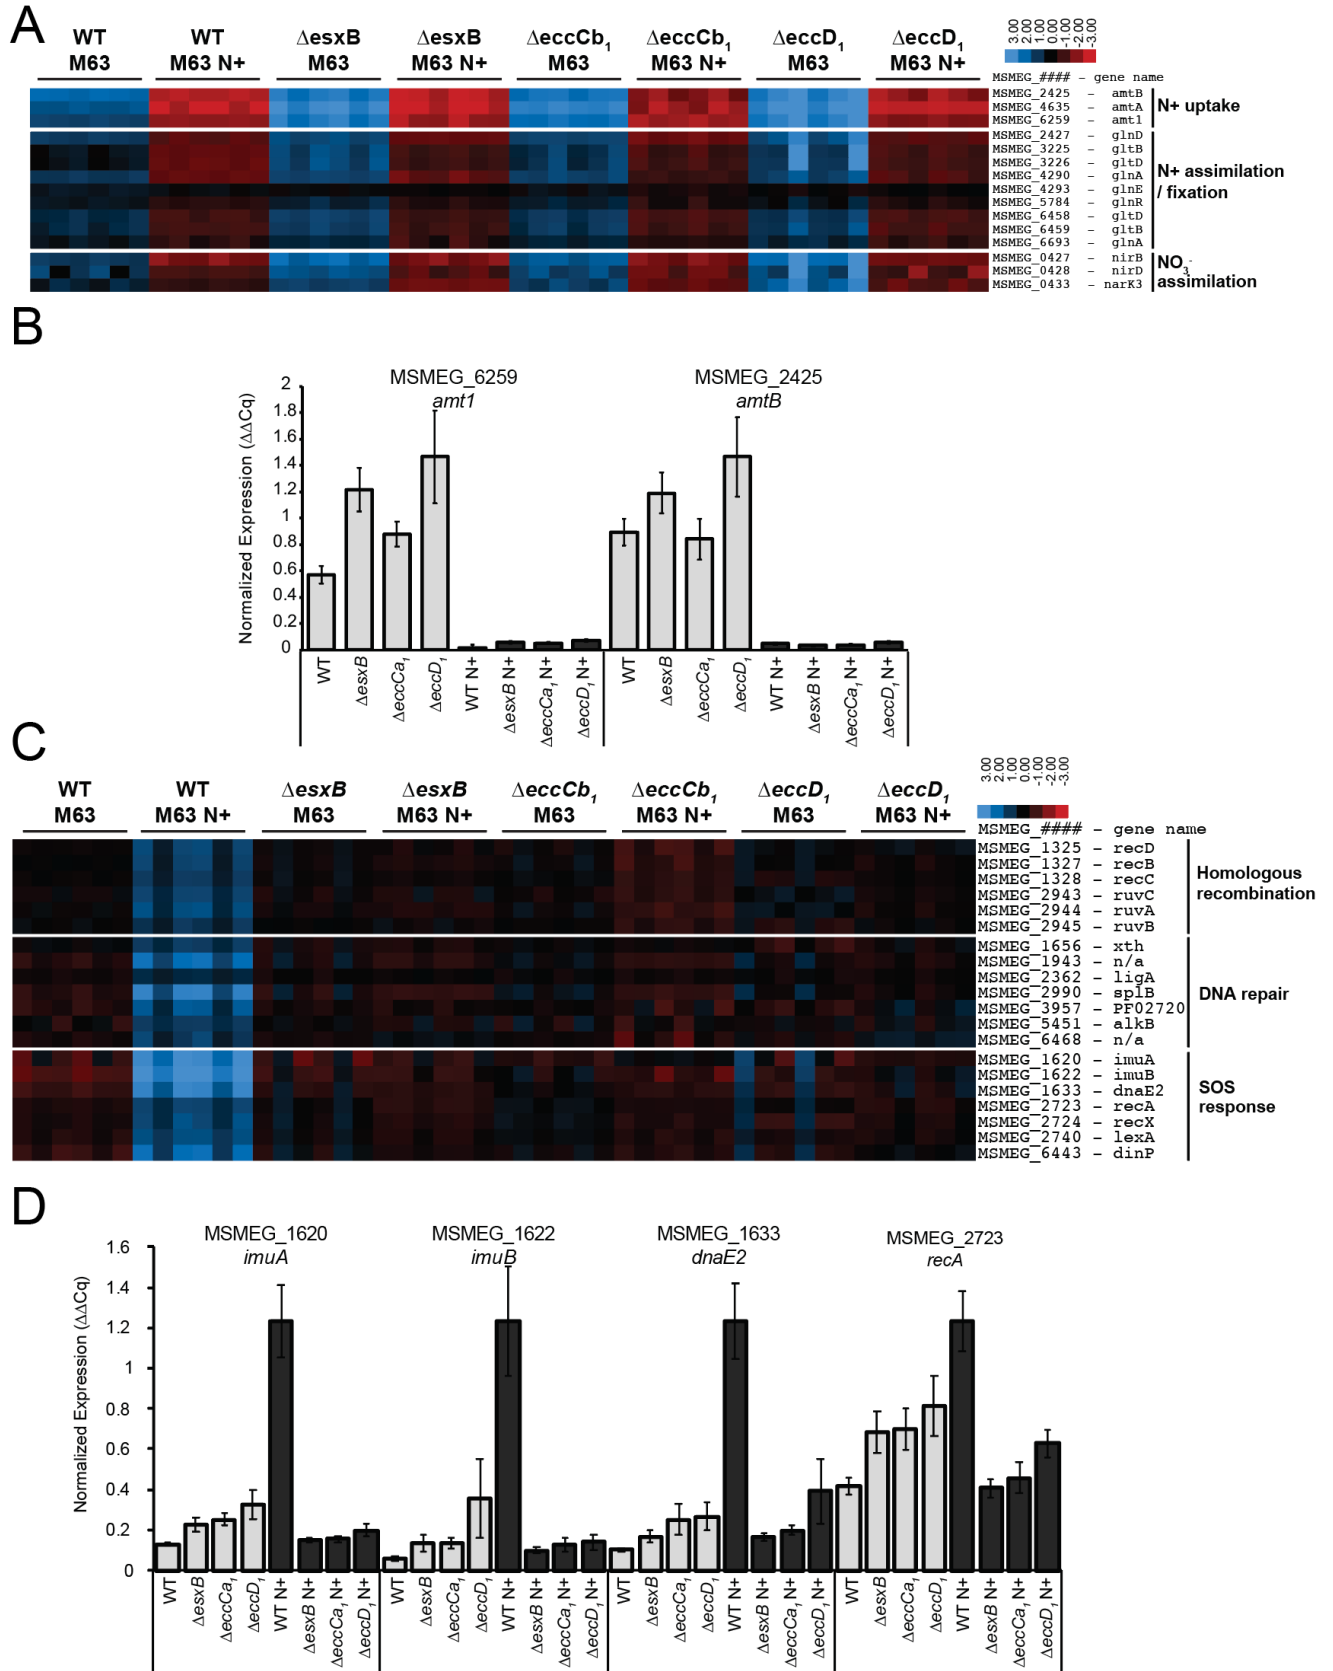

534 **Figure 5: Transcriptional responses to nitrogen reveal a function of ESX-1 in SOS**  
535 **response**

536 A) Heatmap demonstrating ESX-1 knockouts do not influence cellular response to nitrogen.  
537 Log-2 scale for the heatmap is shown in the upper right hand corner of the heatmap. Data are  
538 representative of 3 biological replicates and 2 technical replicates. B) RT-qPCR of *amt1* (left)  
539 and *amtB* (right) transporters in distinct strains. Results were normalized to *sigA* and reported  
540 as  $\Delta\Delta Cq$ . Normalized gene expression across distinct *M. smegmatis* strains grown in two M63  
541 media. Wildtype (WT),  $\Delta esxB$ , and  $\Delta eccD_1$  are shown. N = 3 experiments. C) Heatmap  
542 rendered from RNAseq data displaying DNA repair and SOS response elements upregulated in  
543 response to M63 N+. Log-2 scale for the heatmap is shown in the upper right hand corner of the  
544 heatmap. Data are representative of 3 biological replicates and 2 technical replicates. D) RT-  
545 qPCR of SOS elements: *imuA*, *imuB*, *dnaE2*, *recA*. Results were normalized relative to *sigA*.  
546 Data are represented as  $\Delta\Delta Cq$ . Normalized gene expression across distinct *M. smegmatis*  
547 strains grown in two M63 media. Wildtype (WT),  $\Delta esxB$ , and  $\Delta eccD_1$  are shown. N = 3  
548 experiments.

549

550

551

552

553

554

555

556

557

558

559

560

561

562

563

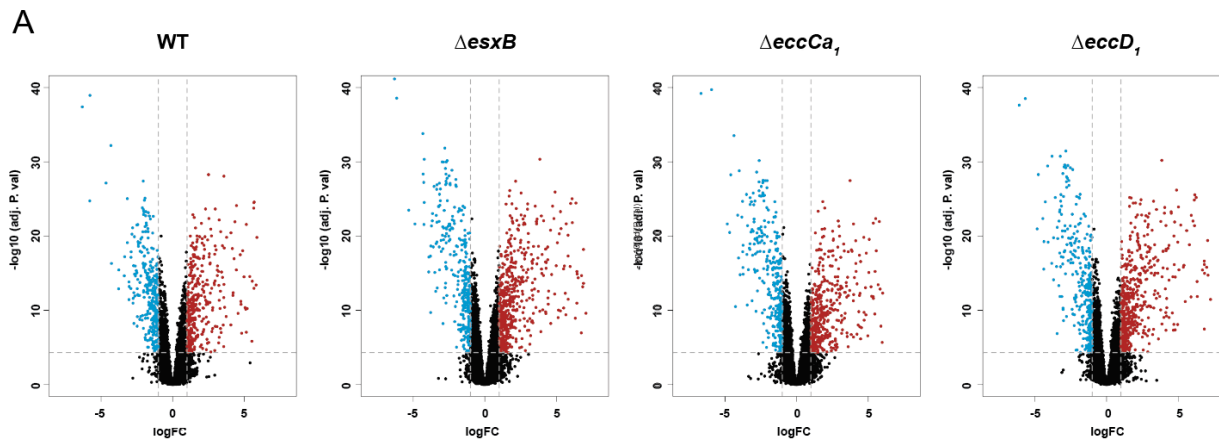

564

565 **Supplemental Figure 5: Differential expression in distinct *M. smegmatis* strains in M63 vs**  
566 **M63 N+.**

567 A) Normalized gene expression across distinct *M. smegmatis* strains grown in two M63 media.  
568 Wildtype (WT),  $\Delta esxB$ , and  $\Delta eccD_1$  are shown. Data are representative of 3 biological replicates  
569 and 2 technical replicates. A) Differential expression volcano plots of *M. smegmatis* strains, WT,  
570 followed by ESX-1 knockouts. Blue genes are upregulated, red genes are downregulated.

571

572

573

574

575

576

577

578

579

580

581

582

583

584

585

586

587

588

589



## 590 Discussion

591 Environmental bacteria live in nutritionally dynamic conditions and require mechanisms to sense  
592 and respond to local overgrowth. Our studies show that ESX-1 alters its function in response to  
593 nitrogen levels. At low nitrogen levels, cells do not secrete; instead ESX-1 assembles into a  
594 megacomplex across spanning both plasma membranes within minutes of cell-cell contact (Fig-  
595 ure 1). At high nitrogen levels, cells secrete ESX substrates, and the megacomplexes disap-  
596 pears. ESX-1 does not appear to be required for forming cell-cell contacts themselves, as ESX-  
597 1 mutants still clump (Supplemental Figure 4). Rather, ESX-1 may contribute to sensing cell  
598 contacts to regulate downstream signaling pathways.

599

600 The presence of ammonium chloride in the medium can be seen as a model of increased  
601 nitrogenous waste from increased bacterial growth and density (DePas et al., 2019; Vince et al.,  
602 1973). Based on our results, we propose a model for ESX-1 secretion throughout various  
603 growth phases (Figure 6). When the bacteria are in initial growth phases in nutritionally  
604 favorable conditions, the nitrogenous waste levels are low, and the bacteria grow in aggregates.  
605 This aggregation triggers accumulation of ESX-1 systems at the cell-to-cell contacts, which in  
606 turn activates ESX-1 focus formation. As a culture enters stationary phase, nitrogenous waste  
607 accumulates and the bacterial surface changes to promote dissociation of the cells, loss of cell-  
608 to-cell contact and diffusion of ESX-1 systems in the membrane. These changes trigger ESX-1  
609 secretion. Although the downstream consequences of ESX-1 secretion are likely pleiotropic, one  
610 clear outcome is the upregulation of genes implicated in SOS response required for translesion  
611 synthesis and mutagenic replication (Figure 5). We speculate that this upregulation leads to an  
612 increase in mutagenic replication and potentially generation of multiple phenotypes to disperse  
613 into new environments during planktonic growth (Kivisaar, 2003).

614

615 *M. smegmatis* ESX-1 has been most extensively studied in the context of direct conjugal  
616 transfer, where it is a key negative regulator of the process in a donor strain (Cao et al., 2015;  
617 Coros et al., 2008; Derbyshire and Gray, 2014; Gray et al., 2016). How our findings relate to  
618 conjugation is not yet clear, as conjugation studies will require optimization of multiple strains  
619 beyond the scope of this work. The formation of ESX-1 foci at cell-cell contacts is certainly  
620 consistent with a role in conjugation at junctions but we speculate that ESX-1 may contribute to  
621 cell-cell communication in a broader sense ESX-1 is not required for DNA transfer per se, and it  
622 has a negative inhibitory role in selecting a specific acceptor strain. Its role in SOS response  
623 may also be seen as part of conjugation preparations for horizontal gene transfer, as the donor

624 cell is preparing its genome for rapid transfer of DNA to an acceptor strain (Guerin et al., 2009).  
625 In this light, DNA replication induced by the error prone polymerase, DnaE2, would trigger  
626 production of DNA to prepare the donor strain for DNA transfer. In the absence of ESX-1,  
627 conjugation is less regulated in the donor strain; any given donor strain is prepared for rapid  
628 DNA transfer to an acceptor strain (Derbyshire and Gray, 2014; Gray et al., 2016). This may be  
629 caused in part by the constitutive increase in basal transcription of SOS response elements  
630 (Figure 5), which as such could represent preparation for conjugation (Flint et al., 2004).

631

632 Our findings have implications for the roles of ESX-1 in virulence of *M. tuberculosis*. It has  
633 generally been assumed that ESX-1 secretes virulence factors that promote growth in the host  
634 intracellular environment (Gröschel et al., 2016). However, the concept of the secretion of a  
635 direct toxin or effector is hard to reconcile with the mild phenotypic differences seen at the early  
636 stages of experimental infection. It has been hypothesized that ESX-1 secretion may only be  
637 important for virulence in the chronic stages of infection (Stanley et al., 2003). Our work  
638 suggests one role of ESX-1 may be to regulate the mycobacterial response to the accumulation  
639 of nitrogenous waste in the phagosome (Gordon et al., 1980), a condition that is also known to  
640 cause phagosomal arrest. We speculate ESX-1 mutants may be more rapidly cleared from  
641 macrophages because they cannot adapt to the nutrient starved, bacterial-dense environment  
642 of the phagosome. A role for this type of adaptive evolution was postulated in seminal work  
643 documenting the importance of translesion synthesis in long term survival and adaptation in *M.*  
644 *tuberculosis* (Boshoff et al., 2004). That work showed that mutations induced by DnaE2 are  
645 required for the long-term survival of mycobacteria in a murine model and hypothesized that  
646 adaptive evolution is responsible for this effect. Further study will be needed to show that the  
647 virulence phenotype of *M. tuberculosis* ESX-1 is related to these findings in a mycobacterial  
648 model organism.

649

650

651

652

653

654

655

656

657

## ESX-1 dynamics during mycobacterial growth

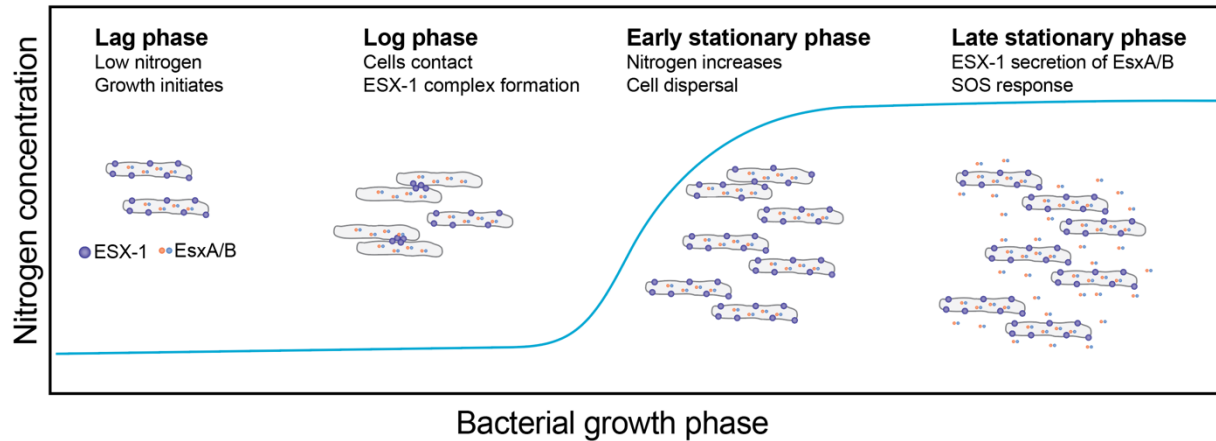

658

659 **Figure 6: Schematic of ESX-1 dynamics during mycobacterial growth.**

660 As a nascent culture grows, ESX-1 is dispersed throughout the plasma membrane of planktonic  
661 cells. As growth continues, cells clump and ESX-1 forms complexes at cell-cell contact points.

662 Once nitrogen levels start increasing in the culture cells commence dispersion and ESX-1

663 complexes dissipate from cell-cell contact points. Once the nitrogen levels are saturated, ESX-1

664 secretion of substrates EsxA/B commences and the SOS response is upregulated in cells.

665

666

667

668

669

670

671

672

673

674

675

676

677

678

679

680

681

## 682 **Materials and Methods**

683

### 684 **Bacterial culture and growth conditions**

685 *M. smegmatis* cultures were grown in Difco 7H9 medium or modified M63 medium (DePas et  
686 al., 2019), at 37 °C and 150 RPM. Starter cultures were inoculated from a single colony on a  
687 7H9 plate and grown for 72 hours, and then diluted 1:50 to inoculate subsequent cultures.

688 Where appropriate, hygromycin was used at a final concentration of 100 µg/mL and kanamycin  
689 was used at a final concentration of 25 µg/mL. To make M63 N+, NH<sub>4</sub>Cl was added to the  
690 medium to a final concentration of 20 mM, unless otherwise noted. All cultures contained 0.05%  
691 tween, unless otherwise noted.

692 *E. coli* cultures were grown in LB medium for plasmid amplification and TB medium for protein  
693 overexpression. Cultures were incubated at 37 °C, 150 RPM. Where appropriate, kanamycin  
694 was used at a final concentration of 50 µg/mL, and hygromycin at a final concentration of 150  
695 µg/mL. Protein expression was induced at an OD<sub>600nm</sub> of 1.0-1.2 by addition of 1 µM IPTG for 2  
696 hours.

697

### 698 **Generation of mutant strains and complementing constructs**

699 To construct chromosomally labeled EGFP strains we used the ORBIT method (Murphy et al.,  
700 2018). In brief, pKM444 was introduced into wild-type and ESX-1 knockouts of MC<sup>2</sup>155 *M.*  
701 *smegmatis*, resulting in a strain producing annealase and resolvase under a P<sub>tet</sub> promoter.

702 Targeting plasmid pKM468 and gene targeting ultramers (Supplemental Table 1) were  
703 electroporated. Recovered cells were plated on 7H9 hygromycin plates. Colonies were  
704 screened for hygromycin resistance and verified using colony PCR and sanger sequencing.

705 Complementation studies were made by introducing the complementing gene of interest  
706 upstream of the mop promoter in plasmid pMV306. pMV306 was restriction digested at the DraI  
707 site and inserts were amplified by PCR with 20bp overlaps with cut pMV306. Infusion was used  
708 to assemble the plasmid. Plasmids were electroporated into cells containing the corresponding  
709 deletions for complementation studies.

710 For co-culture studies, we introduced a cytoplasmic mCherry under a groEL promoter in  
711 pMV261 into either wild-type and ESX-1 knockouts of MC<sup>2</sup>155. pMV261 was amplified by PCR,  
712 upstream of the groEL2 promoter, mCherry was amplified by PCR with 20bp overlaps to  
713 pMV261 and the final product was assembled by infusion. All constructed strains, primers and  
714 plasmids are reported in Supplementary Table 1.

715

716

### 717 **Live cell confocal microscopy**

718 *M. smegmatis* cultures were grown in liquid cultures to exponential phase ( $OD_{600\text{ nm}}$  between  
719 0.6-0.8) and placed into microchannels (ibidi  $\mu$ -slide VI 0.4 slides: ibidi 80606, Ibditreat #1.5)  
720 which had been coated with PDMS prior to imaging. PDMS was prepared by mixing a 1:10 ratio  
721 of curing agent to PDMS and applied to the channels. Excess PDMS was removed from the  
722 channels by blowing air through individual channels, then the PDMS was cured by incubation in  
723 an oven set to 80°C for 20 minutes. Cells were allowed to settle to the bottom of the channel for  
724 10 minutes and then washed with appropriate medium. The chamber was kept at 37°C in a  
725 temperature-controlled enclosure (Okolab) throughout imaging.

726

727 Cells were imaged on a spinning disc confocal system with a 488 nm excitation laser at 50 ms  
728 exposure at 0.1 Hz (30% power), with a 100x objective (Nikon Ph3 100x N.A. 1.4) on a Nikon  
729 TI-E stand equipped with a spinning-disk confocal head (CUS10, Yokogawa) and an EM-CCD  
730 camera (Hamamatsu C9100-13). Images were generally captured in 5-minute intervals for 1  
731 hour. This interval was determined to be the most appropriate when taking into consideration  
732 the 4-hour doubling time for *M. smegmatis*, to fully capture the dynamics of the foci. All imaging  
733 was done across biological triplicates. Images were analyzed by manually outlining the cell-cell  
734 junctions and measuring EGFP intensity for the contact site. During analysis, data were single  
735 blinded.

736

### 737 **Secretion assays**

738 Cultures were inoculated into the appropriate medium from a colony growing on a 7H9 plate.  
739 The cultures were then transferred and grown to mid-log phase ( $OD_{600\text{ nm}} \sim 0.6-0.8$ ). A second  
740 transfer of the cultures was done into medium lacking tween and allowed to reach an  $OD_{600\text{ nm}}$  of  
741 0.8. Cells were harvested by centrifugation at 3000 RPM in an Eppendorf centrifuge. The  
742 supernatant was filtered through a 0.22  $\mu\text{m}$  filter and concentrated 500-fold using a 3,000  
743 MWCO Amicon ultra-15 filter (25 mL to 50  $\mu\text{L}$ ). Whole cell pellets were re-suspended in PBS.  
744 Whole cell resuspensions and culture concentrates were incubated with SDS loading dye and  
745 analyzed by SDS-PAGE using Invitrogen Bis Tris SDS gels. For western blotting of *M.*  
746 *smegmatis* EsxB a polyclonal mouse antibody was raised using an EsxB antigenic peptide  
747 sequence. The anti- GroEL antibody produced in rabbit (Sigma G6532-.5ML) was used to  
748 represent sample integrity.

749

## 750 **RNAseq sample preparation**

751 RNA was extracted from cultures grown to  $OD_{600\text{ nm}} \sim 0.7-0.8$ . Three biological replicates (single  
752 colonies) were prepared for every strain assayed. The NEB RNA extraction kit was used as  
753 directed except for the lysis step, which was completed by bead beating the cells with 0.1 mm  
754 zirconia beads. To deplete rRNA, we used the NEB rRNA kit as directed. Samples were  
755 prepared using the NEBNext Ultra RNA library prep kit for Illumina, and barcoding oligos were  
756 used to pool the libraries. Two technical replicates were prepared for analysis. The resulting  
757 pools were sequenced with the Illumina NovaSeq in 75 nt single end reads, resulting in 15M  
758 reads per sample. All constructed strains are reported in Supplementary Table 1.

759

## 760 **RT-qPCR sample preparation**

761 Primers used for RT-qPCR were validated by qPCR using serial dilutions of genomic DNA  
762 extracted from *M. smegmatis* MC<sup>2</sup>155. The NEB Luna® qPCR Master Mix was used as directed  
763 by the manufacturer. For RT-qPCR, RNA was prepared as outlined in the RNAseq section, in  
764 biological triplicates. Samples were normalized to 75 ng/ $\mu$ L and assayed in technical duplicates  
765 analyzed using the NEB Luna® Universal One-Step RT-qPCR kit. All constructed strains and  
766 primers are reported in Supplementary Table 1.

767

768

769

## 770 **Bioinformatics**

771 Transcripts were pseudo aligned with KALLISTO (Bray et al., 2016) to the *M. smegmatis*  
772 MC<sup>2</sup>155 coding sequences (NCBI accession GCF\_000015005.1) to estimate relative  
773 abundances (reported as TPM values) and estimated counts (est\_counts). Further analysis was  
774 restricted to transcripts with  $TPM \geq 1$  in at least one sample. Differential expression between  
775 different genotypes and growth conditions was estimated using LIMMA version 3 (Ritchie et al.,  
776 2015; Smyth, 2004), and transcripts were considered to be significantly differentially expressed  
777 if they had a log<sub>2</sub> fold change of at least 1 at a false discovery rate (FDR) of 5%. Corresponding  
778 files have been deposited in the Gene Expression Omnibus database under accession number  
779 GSE185010.

780

## 781 **Acknowledgements**

782 We thank Jeff Cox for providing strains of *M. smegmatis* MC<sup>2</sup>155  $\Delta eccB_1$ ,  $\Delta eccCb_1$ ,  $\Delta eccD_1$ , and  
783  $\Delta eccE_1$ . We are grateful to the Infectious Disease Team (Amy Lyden, Emily Crawford) and the

784 Sequencing Team (Norma Neff, Feiqiao Brian Yu, Michelle Tan, Angela Detweiler, Honey  
785 Mekonen) at the Chan Zuckerberg Biohub who assisted with RNAseq sample preparation  
786 guidelines and sequencing. We thank Carol A. Gross for helpful discussions and critical reading  
787 of the manuscript. We acknowledge the Burroughs Wellcome Fund Postdoctoral Enrichment  
788 Award #1019894, NIH T32 training grant (5T32HL007185-42) and the University of California  
789 President's Postdoctoral Fellowship to NH; and NIH NIAID R01AI128214 and Chan Zuckerberg  
790 Biohub funding to OSR.

791

## 792 **Contributions**

793 NH and OSR designed the project and wrote the initial manuscript. NH and RN designed and  
794 engineered the *M. smegmatis* strains made for this study. NH, PDO, and FC designed and  
795 implemented the imaging experiments. NH, MV, and AS designed and implemented the  
796 RNAseq data acquisition and analysis. All authors revised and edited the manuscript.

797

## 798 **References**

- 799 Amon, J., Titgemeyer, F., Burkovski, A., 2009. A genomic view on nitrogen metabolism and  
800 nitrogen control in mycobacteria. *J Mol Microbiol Biotechnol* 17, 20–29.  
801 doi:10.1159/000159195
- 802 Baptista, C., Barreto, H.C., São-José, C., 2013. High levels of DegU-P activate an Esat-6-like  
803 secretion system in *Bacillus subtilis*. *PLoS One* 8, e67840.  
804 doi:10.1371/journal.pone.0067840
- 805 Beckham, K.S.H., Ciccarelli, L., Bunduc, C.M., Mertens, H.D.T., Ummels, R., Lugmayr, W.,  
806 Mayr, J., Rettel, M., Savitski, M.M., Svergun, D.I., Bitter, W., Wilmanns, M., Marlovits,  
807 T.C., Parret, A.H.A., Houben, E.N.G., 2017. Structure of the mycobacterial ESX-5 type  
808 VII secretion system membrane complex by single-particle analysis. *Nat. Microbiol.* 2,  
809 17047. doi:10.1038/nmicrobiol.2017.47
- 810 Beckham, K.S.H., Ritter, C., Chojnowski, G., Ziemianowicz, D.S., Mullapudi, E., Rettel, M.,  
811 Savitski, M.M., Mortensen, S.A., Kosinski, J., Wilmanns, M., 2021. Structure of the  
812 mycobacterial ESX-5 type VII secretion system pore complex. *Sci. Adv.* 7.  
813 doi:10.1126/sciadv.abg9923
- 814 Berthet, F.X., Rasmussen, P.B., Rosenkrands, I., Andersen, P., Gicquel, B., 1998. A  
815 *Mycobacterium tuberculosis* operon encoding ESAT-6 and a novel low-molecular-mass  
816 culture filtrate protein (CFP-10). *Microbiology (Reading, Engl.)* 144 ( Pt 11), 3195–3203.  
817 doi:10.1099/00221287-144-11-3195
- 818 Boshoff, H.I.M., Myers, T.G., Copp, B.R., McNeil, M.R., Wilson, M.A., Barry, C.E., 2004. The  
819 transcriptional responses of *Mycobacterium tuberculosis* to inhibitors of metabolism:  
820 novel insights into drug mechanisms of action. *J. Biol. Chem.* 279, 40174–40184.  
821 doi:10.1074/jbc.M406796200
- 822 Bray, N.L., Pimentel, H., Melsted, P., Pachter, L., 2016. Near-optimal probabilistic RNA-seq  
823 quantification. *Nat. Biotechnol.* 34, 525–527. doi:10.1038/nbt.3519
- 824 Burts, M.L., DeDent, A.C., Missiakas, D.M., 2008. EsaC substrate for the ESAT-6 secretion  
825 pathway and its role in persistent infections of *Staphylococcus aureus*. *Mol. Microbiol.*  
826 69, 736–746. doi:10.1111/j.1365-2958.2008.06324.x

- 827 Burts, M.L., Williams, W.A., DeBord, K., Missiakas, D.M., 2005. EsxA and EsxB are secreted by  
828 an ESAT-6-like system that is required for the pathogenesis of *Staphylococcus aureus*  
829 infections. *Proc. Natl. Acad. Sci. USA* 102, 1169–1174. doi:10.1073/pnas.0405620102
- 830 Cao, G., Howard, S.T., Zhang, P., Wang, X., Chen, X.-L., Samten, B., Pang, X., 2015. EspR, a  
831 regulator of the ESX-1 secretion system in *Mycobacterium tuberculosis*, is directly  
832 regulated by the two-component systems MprAB and PhoPR. *Microbiology (Reading,*  
833 *Engl.)* 161, 477–489. doi:10.1099/mic.0.000023
- 834 Carlsson, F., Joshi, S.A., Rangell, L., Brown, E.J., 2009. Polar localization of virulence-related  
835 Esx-1 secretion in mycobacteria. *PLoS Pathog.* 5, e1000285.  
836 doi:10.1371/journal.ppat.1000285
- 837 Coffman, V.C., Wu, J.-Q., 2012. Counting protein molecules using quantitative fluorescence  
838 microscopy. *Trends Biochem. Sci.* 37, 499–506. doi:10.1016/j.tibs.2012.08.002
- 839 Cole, S.T., Brosch, R., Parkhill, J., Garnier, T., Churcher, C., Harris, D., Gordon, S.V., Eiglmeier,  
840 K., Gas, S., Barry, C.E., Tekaiia, F., Badcock, K., Basham, D., Brown, D., Chillingworth,  
841 T., Connor, R., Davies, R., Devlin, K., Feltwell, T., Gentles, S., Hamlin, N., Holroyd, S.,  
842 Hornsby, T., Jagels, K., Krogh, A., McLean, J., Moule, S., Murphy, L., Oliver, K.,  
843 Osborne, J., Quail, M.A., Rajandream, M.A., Rogers, J., Rutter, S., Seeger, K., Skelton,  
844 J., Squares, R., Squares, S., Sulston, J.E., Taylor, K., Whitehead, S., Barrell, B.G.,  
845 1998. Deciphering the biology of *Mycobacterium tuberculosis* from the complete genome  
846 sequence. *Nature* 393, 537–544. doi:10.1038/31159
- 847 Converse, S.E., Cox, J.S., 2005. A protein secretion pathway critical for *Mycobacterium*  
848 *tuberculosis* virulence is conserved and functional in *Mycobacterium smegmatis*. *J.*  
849 *Bacteriol.* 187, 1238–1245. doi:10.1128/JB.187.4.1238-1245.2005
- 850 Coros, A., Callahan, B., Battaglioli, E., Derbyshire, K.M., 2008. The specialized secretory  
851 apparatus ESX-1 is essential for DNA transfer in *Mycobacterium smegmatis*. *Mol.*  
852 *Microbiol.* 69, 794–808. doi:10.1111/j.1365-2958.2008.06299.x
- 853 DePas, W.H., Bergkessel, M., Newman, D.K., 2019. Aggregation of Nontuberculous  
854 *Mycobacteria* Is Regulated by Carbon-Nitrogen Balance. *MBio* 10.  
855 doi:10.1128/mBio.01715-19
- 856 Derbyshire, K.M., Gray, T.A., 2014. Distributive Conjugal Transfer: New Insights into Horizontal  
857 Gene Transfer and Genetic Exchange in *Mycobacteria*. *Microbiol. Spectr.* 2.  
858 doi:10.1128/microbiolspec.MGM2-0022-2013
- 859 Dumas, E., Christina Boritsch, E., Vandenbogaert, M., Rodríguez de la Vega, R.C., Thiberge,  
860 J.-M., Caro, V., Gaillard, J.-L., Heym, B., Girard-Misguich, F., Brosch, R., Sapriel, G.,  
861 2016. Mycobacterial Pan-Genome Analysis Suggests Important Role of Plasmids in the  
862 Radiation of Type VII Secretion Systems. *Genome Biol. Evol.* 8, 387–402.  
863 doi:10.1093/gbe/evw001
- 864 Elliott, S.R., Tischler, A.D., 2016. Phosphate responsive regulation provides insights for ESX-5  
865 function in *Mycobacterium tuberculosis*. *Curr. Genet.* 62, 759–763. doi:10.1007/s00294-  
866 016-0604-4
- 867 Famelis, N., Rivera-Calzada, A., Degliesposti, G., Wingender, M., Mietrach, N., Skehel, J.M.,  
868 Fernandez-Leiro, R., Böttcher, B., Schlosser, A., Llorca, O., Geibel, S., 2019.  
869 Architecture of the mycobacterial type VII secretion system. *Nature* 576, 321–325.  
870 doi:10.1038/s41586-019-1633-1
- 871 Flint, J.L., Kowalski, J.C., Karnati, P.K., Derbyshire, K.M., 2004. The RD1 virulence locus of  
872 *Mycobacterium tuberculosis* regulates DNA transfer in *Mycobacterium smegmatis*. *Proc.*  
873 *Natl. Acad. Sci. USA* 101, 12598–12603. doi:10.1073/pnas.0404892101
- 874 Fortune, S.M., Jaeger, A., Sarracino, D.A., Chase, M.R., Sasseti, C.M., Sherman, D.R., Bloom,  
875 B.R., Rubin, E.J., 2005. Mutually dependent secretion of proteins required for  
876 mycobacterial virulence. *Proc. Natl. Acad. Sci. USA* 102, 10676–10681.  
877 doi:10.1073/pnas.0504922102



- 878 Garufi, G., Butler, E., Missiakas, D., 2008. ESAT-6-like protein secretion in *Bacillus anthracis*. *J.*  
879 *Bacteriol.* 190, 7004–7011. doi:10.1128/JB.00458-08
- 880 Gey Van Pittius, N.C., Gamielidien, J., Hide, W., Brown, G.D., Siezen, R.J., Beyers, A.D., 2001.  
881 The ESAT-6 gene cluster of *Mycobacterium tuberculosis* and other high G+C Gram-  
882 positive bacteria. *Genome Biol.* 2, RESEARCH0044. doi:10.1186/gb-2001-2-10-  
883 research0044
- 884 Glaeser, R.M., Taylor, K.A., 1978. Radiation damage relative to transmission electron  
885 microscopy of biological specimens at low temperature: a review. *J. Microsc.* 112,  
886 127–138.
- 887 Gordon, A.H., Hart, P.D., Young, M.R., 1980. Ammonia inhibits phagosome-lysosome fusion in  
888 macrophages. *Nature* 286, 79–80. doi:10.1038/286079a0
- 889 Gray, T.A., Clark, R.R., Boucher, N., Lapierre, P., Smith, C., Derbyshire, K.M., 2016.  
890 Intercellular communication and conjugation are mediated by ESX secretion systems in  
891 mycobacteria. *Science* 354, 347–350. doi:10.1126/science.aag0828
- 892 Gröschel, M.I., Sayes, F., Simeone, R., Majlessi, L., Brosch, R., 2016. ESX secretion systems:  
893 mycobacterial evolution to counter host immunity. *Nat. Rev. Microbiol.* 14, 677–691.  
894 doi:10.1038/nrmicro.2016.131
- 895 Guerin, E., Cambray, G., Sanchez-Alberola, N., Campoy, S., Erill, I., Da Re, S., Gonzalez-Zorn,  
896 B., Barbé, J., Ploy, M.-C., Mazel, D., 2009. The SOS response controls integron  
897 recombination. *Science* 324, 1034. doi:10.1126/science.1172914
- 898 Hsu, T., Hingley-Wilson, S.M., Chen, B., Chen, M., Dai, A.Z., Morin, P.M., Marks, C.B., Padiyar,  
899 J., Goulding, C., Gingery, M., Eisenberg, D., Russell, R.G., Derrick, S.C., Collins, F.M.,  
900 Morris, S.L., King, C.H., Jacobs, W.R., 2003. The primary mechanism of attenuation of  
901 *bacillus Calmette-Guerin* is a loss of secreted lytic function required for invasion of lung  
902 interstitial tissue. *Proc. Natl. Acad. Sci. USA* 100, 12420–12425.  
903 doi:10.1073/pnas.1635213100
- 904 Huppert, L.A., Ramsdell, T.L., Chase, M.R., Sarracino, D.A., Fortune, S.M., Burton, B.M., 2014.  
905 The ESX system in *Bacillus subtilis* mediates protein secretion. *PLoS One* 9, e96267.  
906 doi:10.1371/journal.pone.0096267
- 907 Kivisaar, M., 2003. Stationary phase mutagenesis: mechanisms that accelerate adaptation of  
908 microbial populations under environmental stress. *Environ. Microbiol.* 5, 814–827.  
909 doi:10.1046/j.1462-2920.2003.00488.x
- 910 Landgraf, D., Okumus, B., Chien, P., Baker, T.A., Paulsson, J., 2012. Segregation of molecules  
911 at cell division reveals native protein localization. *Nat. Methods* 9, 480–482.  
912 doi:10.1038/nmeth.1955
- 913 Leake, M.C., Chandler, J.H., Wadhams, G.H., Bai, F., Berry, R.M., Armitage, J.P., 2006.  
914 Stoichiometry and turnover in single, functioning membrane protein complexes. *Nature*  
915 443, 355–358. doi:10.1038/nature05135
- 916 Murphy, K.C., Nelson, S.J., Nambi, S., Papavinasasundaram, K., Baer, C.E., Sasseti, C.M.,  
917 2018. ORBIT: a new paradigm for genetic engineering of mycobacterial chromosomes.  
918 *MBio* 9. doi:10.1128/mBio.01467-18
- 919 Newton-Foot, M., Warren, R.M., Sampson, S.L., van Helden, P.D., Gey van Pittius, N.C., 2016.  
920 The plasmid-mediated evolution of the mycobacterial ESX (Type VII) secretion systems.  
921 *BMC Evol. Biol.* 16, 62. doi:10.1186/s12862-016-0631-2
- 922 Pallen, M.J., 2002. The ESAT-6/WXG100 superfamily -- and a new Gram-positive secretion  
923 system? *Trends Microbiol.* 10, 209–212. doi:10.1016/s0966-842x(02)02345-4
- 924 Pan, K.Z., Saunders, T.E., Flor-Parra, I., Howard, M., Chang, F., 2014. Cortical regulation of cell  
925 size by a sizer *cdr2p*. *Elife* 3, e02040. doi:10.7554/eLife.02040
- 926 Petridis, M., Benjak, A., Cook, G.M., 2015. Defining the nitrogen regulated transcriptome of  
927 *Mycobacterium smegmatis* using continuous culture. *BMC Genomics* 16, 821.  
928 doi:10.1186/s12864-015-2051-x

- 929 Phan, T.H., van Leeuwen, L.M., Kuijl, C., Ummels, R., van Stempvoort, G., Rubio-Canalejas, A.,  
930 Piersma, S.R., Jiménez, C.R., van der Sar, A.M., Houben, E.N.G., Bitter, W., 2018.  
931 EspH is a hypervirulence factor for *Mycobacterium marinum* and essential for the  
932 secretion of the ESX-1 substrates EspE and EspF. *PLoS Pathog.* 14, e1007247.  
933 doi:10.1371/journal.ppat.1007247
- 934 Poweleit, N., Czudnochowski, N., Nakagawa, R., Trinidad, D.D., Murphy, K.C., Sasseti, C.M.,  
935 Rosenberg, O.S., 2019. The structure of the endogenous ESX-3 secretion system. *Elife*  
936 8. doi:10.7554/eLife.52983
- 937 Pym, A.S., Brodin, P., Brosch, R., Huerre, M., Cole, S.T., 2002. Loss of RD1 contributed to the  
938 attenuation of the live tuberculosis vaccines *Mycobacterium bovis* BCG and  
939 *Mycobacterium microti*. *Mol. Microbiol.* 46, 709–717. doi:10.1046/j.1365-  
940 2958.2002.03237.x
- 941 Pym, A.S., Brodin, P., Majlessi, L., Brosch, R., Demangel, C., Williams, A., Griffiths, K.E.,  
942 Marchal, G., Leclerc, C., Cole, S.T., 2003. Recombinant BCG exporting ESAT-6 confers  
943 enhanced protection against tuberculosis. *Nat. Med.* 9, 533–539. doi:10.1038/nm859
- 944 Ritchie, M.E., Phipson, B., Wu, D., Hu, Y., Law, C.W., Shi, W., Smyth, G.K., 2015. limma  
945 powers differential expression analyses for RNA-sequencing and microarray studies.  
946 *Nucleic Acids Res.* 43, e47. doi:10.1093/nar/gkv007
- 947 Sasseti, C.M., Rubin, E.J., 2003. Genetic requirements for mycobacterial survival during  
948 infection. *Proc. Natl. Acad. Sci. USA* 100, 12989–12994. doi:10.1073/pnas.2134250100
- 949 Serafini, A., Boldrin, F., Palù, G., Manganelli, R., 2009. Characterization of a *Mycobacterium*  
950 tuberculosis ESX-3 conditional mutant: essentiality and rescue by iron and zinc. *J.*  
951 *Bacteriol.* 191, 6340–6344. doi:10.1128/JB.00756-09
- 952 Serafini, A., Pisu, D., Palù, G., Rodriguez, G.M., Manganelli, R., 2013. The ESX-3 secretion  
953 system is necessary for iron and zinc homeostasis in *Mycobacterium tuberculosis*. *PLoS*  
954 *One* 8, e78351. doi:10.1371/journal.pone.0078351
- 955 Siegrist, M.S., Steigedal, M., Ahmad, R., Mehra, A., Dragset, M.S., Schuster, B.M., Philips, J.A.,  
956 Carr, S.A., Rubin, E.J., 2014. Mycobacterial Esx-3 requires multiple components for iron  
957 acquisition. *MBio* 5, e01073-14. doi:10.1128/mBio.01073-14
- 958 Siegrist, M.S., Unnikrishnan, M., McConnell, M.J., Borowsky, M., Cheng, T.-Y., Siddiqi, N.,  
959 Fortune, S.M., Moody, D.B., Rubin, E.J., 2009. Mycobacterial Esx-3 is required for  
960 mycobactin-mediated iron acquisition. *Proc. Natl. Acad. Sci. USA* 106, 18792–18797.  
961 doi:10.1073/pnas.0900589106
- 962 Smyth, G.K., 2004. Linear models and empirical bayes methods for assessing differential  
963 expression in microarray experiments. *Stat Appl Genet Mol Biol* 3, Article3.  
964 doi:10.2202/1544-6115.1027
- 965 Soler-Arnedo, P., Sala, C., Zhang, M., Cole, S.T., Piton, J., 2020. Polarly Localized EccE1 Is  
966 Required for ESX-1 Function and Stabilization of ESX-1 Membrane Proteins in  
967 *Mycobacterium tuberculosis*. *J. Bacteriol.* 202. doi:10.1128/JB.00662-19
- 968 Sørensen, A.L., Nagai, S., Houen, G., Andersen, P., Andersen, A.B., 1995. Purification and  
969 characterization of a low-molecular-mass T-cell antigen secreted by *Mycobacterium*  
970 tuberculosis. *Infect. Immun.* 63, 1710–1717. doi:10.1128/IAI.63.5.1710-1717.1995
- 971 Stanley, S.A., Raghavan, S., Hwang, W.W., Cox, J.S., 2003. Acute infection and macrophage  
972 subversion by *Mycobacterium tuberculosis* require a specialized secretion system.  
973 *Proc. Natl. Acad. Sci. U. S. A.* 100, 13001–13006.
- 974 Tufariello, J.M., Chapman, J.R., Kerantzas, C.A., Wong, K.-W., Vilchèze, C., Jones, C.M., Cole,  
975 L.E., Tinaztepe, E., Thompson, V., Fenyö, D., Niederweis, M., Ueberheide, B., Philips,  
976 J.A., Jacobs, W.R., 2016. Separable roles for *Mycobacterium tuberculosis* ESX-3  
977 effectors in iron acquisition and virulence. *Proc. Natl. Acad. Sci. USA* 113, E348-57.  
978 doi:10.1073/pnas.1523321113
- 979 Vince, A., Dawson, A.M., Park, N., O'Grady, F., 1973. Ammonia production by intestinal

980 bacteria. *Gut* 14, 171–177. doi:10.1136/gut.14.3.171  
981 Way, S.S., Wilson, C.B., 2005. The *Mycobacterium tuberculosis* ESAT-6 homologue in *Listeria*  
982 *monocytogenes* is dispensable for growth in vitro and in vivo. *Infect. Immun.* 73, 6151–  
983 6153. doi:10.1128/IAI.73.9.6151-6153.2005  
984 Williams, K.J., Bryant, W.A., Jenkins, V.A., Barton, G.R., Witney, A.A., Pinney, J.W., Robertson,  
985 B.D., 2013. Deciphering the response of *Mycobacterium smegmatis* to nitrogen stress  
986 using bipartite active modules. *BMC Genomics* 14, 436. doi:10.1186/1471-2164-14-436  
987 Wirth, S.E., Krywy, J.A., Aldridge, B.B., Fortune, S.M., Fernandez-Suarez, M., Gray, T.A.,  
988 Derbyshire, K.M., 2012. Polar assembly and scaffolding proteins of the virulence-  
989 associated ESX-1 secretory apparatus in mycobacteria. *Mol. Microbiol.* 83, 654–664.  
990 doi:10.1111/j.1365-2958.2011.07958.x  
991
